# Supplementary material for: Subscriptions and external links help drive resentful users to alternative and extremist YouTube channels
Source: PubMed Central journal article supplement — Sci Adv. 2023 Aug 30;9(35):eadd8080. doi: 10.1126/sciadv.add8080 (PMC10468121; doi:10.1126/sciadv.add8080), 2023-08-30
Supplement: sciadv.add8080_sm.pdf [file sciadv.add8080_sm.pdf]

Supplementary Materials for  
**Subscriptions and external links help drive resentful users to alternative and  
extremist YouTube channels**

Annie Y. Chen *et al.*

Corresponding author: Brendan Nyhan, [nyhan@dartmouth.edu](mailto:nyhan@dartmouth.edu)

*Sci. Adv.* **9**, eadd8080 (2023)  
DOI: 10.1126/sciadv.add8080

**This PDF file includes:**

Figs. S1 to S18  
Tables S1 to S10  
Sample details and additional results  
Session trajectories  
Channel labeling criteria  
Ethics and consent language  
Survey codebook

Table S1: Full and extension sample demographics

|                               | Full sample    |                | Extension sample |                |
|-------------------------------|----------------|----------------|------------------|----------------|
|                               | weighted       | unweighted     | weighted         | unweighted     |
| <b>Gender</b>                 |                |                |                  |                |
| Female                        | 0.48<br>(0.01) | 0.46<br>(0.01) | 0.49<br>(0.02)   | 0.49<br>(0.01) |
| Male                          | 0.52<br>(0.01) | 0.54<br>(0.01) | 0.51<br>(0.02)   | 0.51<br>(0.01) |
| <b>Race</b>                   |                |                |                  |                |
| White                         | 0.68<br>(0.01) | 0.76<br>(0.01) | 0.69<br>(0.02)   | 0.75<br>(0.01) |
| Black                         | 0.12<br>(0.01) | 0.08<br>(0.00) | 0.14<br>(0.02)   | 0.08<br>(0.01) |
| Hispanic                      | 0.10<br>(0.01) | 0.07<br>(0.00) | 0.10<br>(0.02)   | 0.07<br>(0.01) |
| Asian                         | 0.04<br>(0.01) | 0.04<br>(0.00) | 0.04<br>(0.01)   | 0.04<br>(0.01) |
| <b>2016 presidential vote</b> |                |                |                  |                |
| Donald Trump                  | 0.33<br>(0.01) | 0.40<br>(0.01) | 0.19<br>(0.02)   | 0.20<br>(0.01) |
| Hillary Clinton               | 0.28<br>(0.01) | 0.31<br>(0.01) | 0.40<br>(0.02)   | 0.49<br>(0.01) |
| <b>Employment status</b>      |                |                |                  |                |
| Employed                      | 0.46<br>(0.01) | 0.49<br>(0.01) | 0.48<br>(0.02)   | 0.51<br>(0.01) |
| Unemployed                    | 0.12<br>(0.01) | 0.10<br>(0.00) | 0.12<br>(0.02)   | 0.10<br>(0.01) |
| <b>Education</b>              |                |                |                  |                |
| High school graduate          | 0.35<br>(0.01) | 0.19<br>(0.01) | 0.26<br>(0.02)   | 0.14<br>(0.01) |
| Some college                  | 0.35<br>(0.01) | 0.37<br>(0.01) | 0.37<br>(0.02)   | 0.35<br>(0.01) |
| 4-year                        | 0.19<br>(0.01) | 0.26<br>(0.01) | 0.24<br>(0.02)   | 0.28<br>(0.01) |
| Post-grad                     | 0.11<br>(0.01) | 0.18<br>(0.01) | 0.13<br>(0.01)   | 0.23<br>(0.01) |
| <b>Religion</b>               |                |                |                  |                |
| Atheist/Agnostic              | 0.37<br>(0.01) | 0.35<br>(0.01) | 0.47<br>(0.02)   | 0.46<br>(0.01) |
| Protestant                    | 0.32<br>(0.01) | 0.34<br>(0.01) | 0.26<br>(0.02)   | 0.27<br>(0.01) |
| Roman Catholic                | 0.18<br>(0.01) | 0.18<br>(0.01) | 0.15<br>(0.02)   | 0.14<br>(0.01) |
| <b>Marital status</b>         |                |                |                  |                |
| Divorced                      | 0.11<br>(0.01) | 0.12<br>(0.01) | 0.10<br>(0.01)   | 0.12<br>(0.01) |
| Married                       | 0.43<br>(0.01) | 0.53<br>(0.01) | 0.39<br>(0.02)   | 0.48<br>(0.01) |
| Never married                 | 0.35<br>(0.01) | 0.26<br>(0.01) | 0.39<br>(0.02)   | 0.30<br>(0.01) |
| <b>Party identification</b>   |                |                |                  |                |
| Democrat                      | 0.37<br>(0.01) | 0.35<br>(0.01) | 0.51<br>(0.02)   | 0.54<br>(0.01) |
| Independent                   | 0.32<br>(0.01) | 0.32<br>(0.01) | 0.29<br>(0.02)   | 0.28<br>(0.01) |
| Republican                    | 0.31<br>(0.01) | 0.33<br>(0.01) | 0.20<br>(0.02)   | 0.18<br>(0.01) |
| <b>Age</b>                    |                |                |                  |                |
| 18-34                         | 0.27<br>(0.01) | 0.16<br>(0.01) | 0.33<br>(0.02)   | 0.21<br>(0.01) |
| 35-54                         | 0.33<br>(0.01) | 0.34<br>(0.01) | 0.31<br>(0.02)   | 0.37<br>(0.01) |
| 55-64                         | 0.18<br>(0.01) | 0.23<br>(0.01) | 0.18<br>(0.01)   | 0.24<br>(0.01) |
| 65+                           | 0.21<br>(0.01) | 0.27<br>(0.01) | 0.18<br>(0.02)   | 0.19<br>(0.01) |
| <b>Sample size</b>            |                |                |                  |                |
| N                             | 4000           | 4000           | 1236             | 1236           |

Weighted estimates use YouGov survey weights. Standard errors are in parentheses.

# Enrollment and consumption over time

Figure S1: Total participants with browser activity data over time

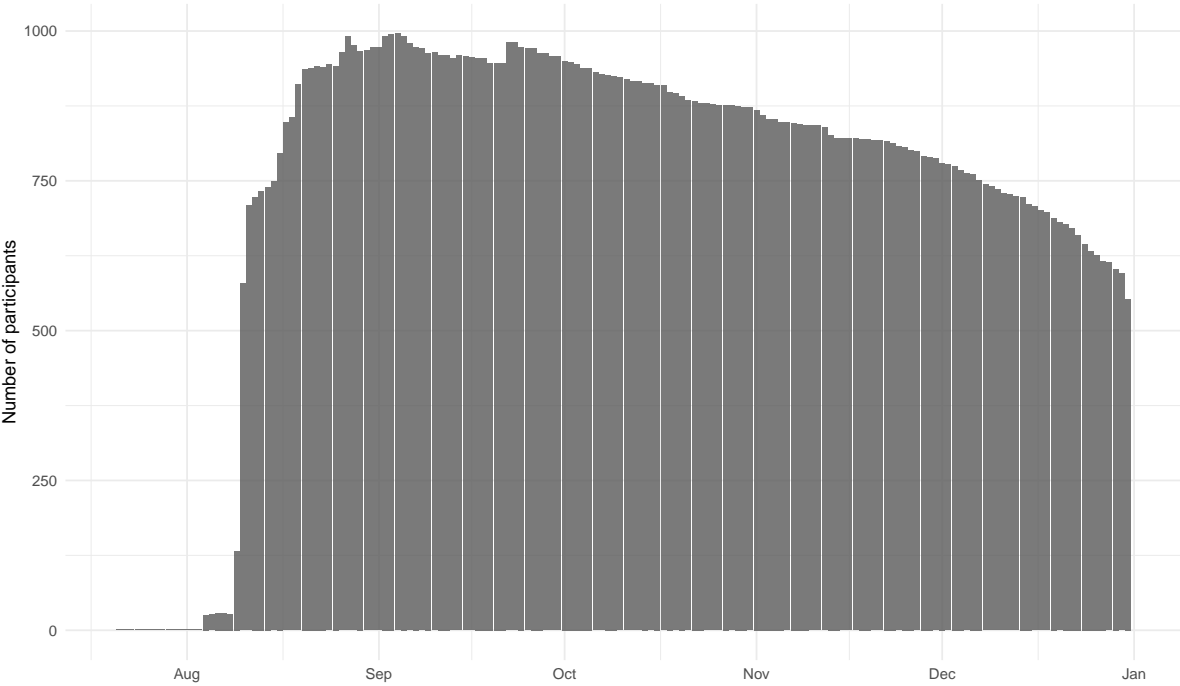

Day-level totals of the number of study participants with browser activity data (N=1,181). All results incorporate survey weights.

Figure S2: Consumption levels over time by channel type

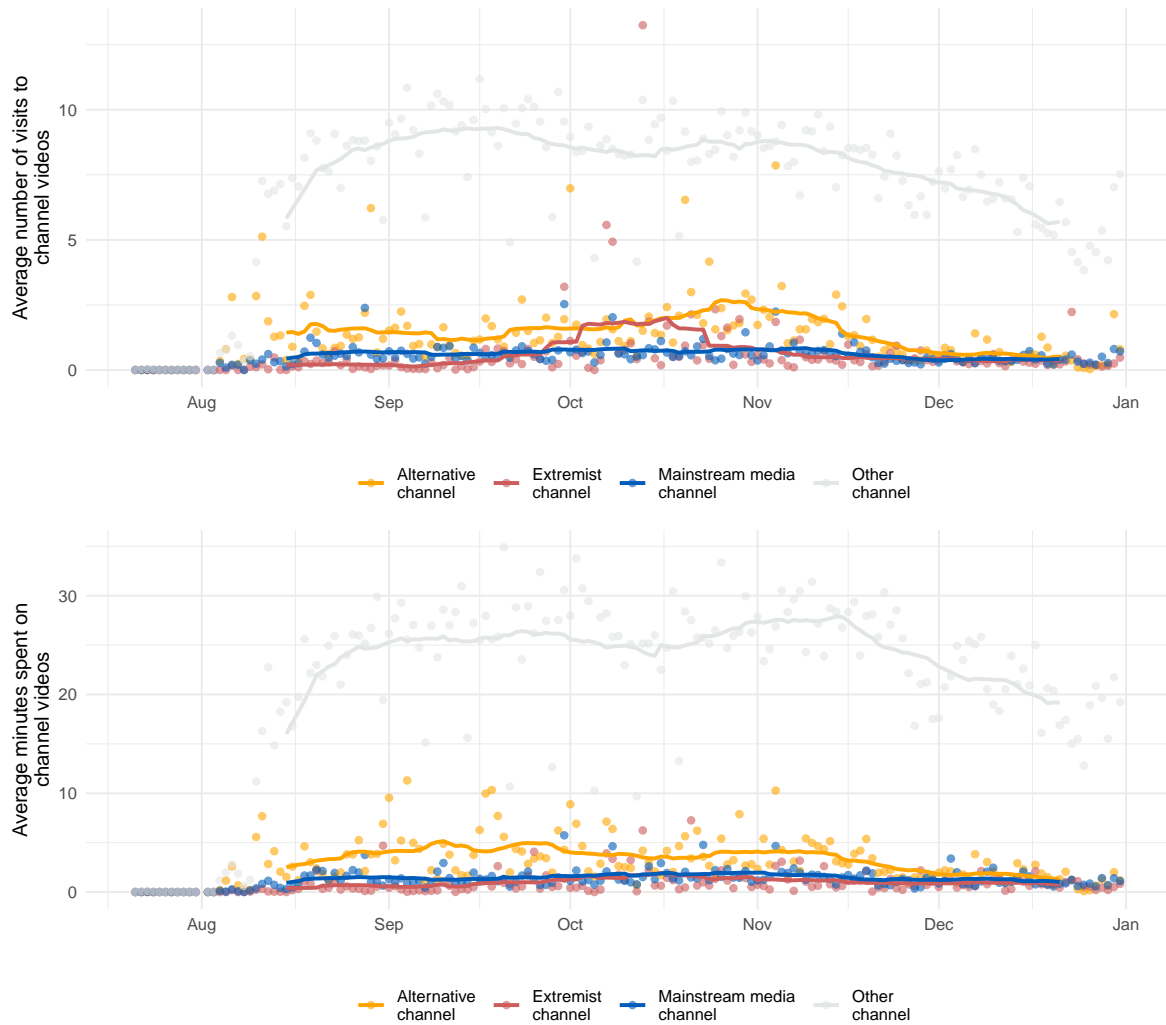

Each point represents the weighted mean number of views (top panel) or minutes spent (bottom panel) on videos from each channel type per day (N=1,181). Trend lines are three-week moving averages. All results incorporate survey weights.

Figure S3: YouTube video diets of individuals who viewed any alternative channel video

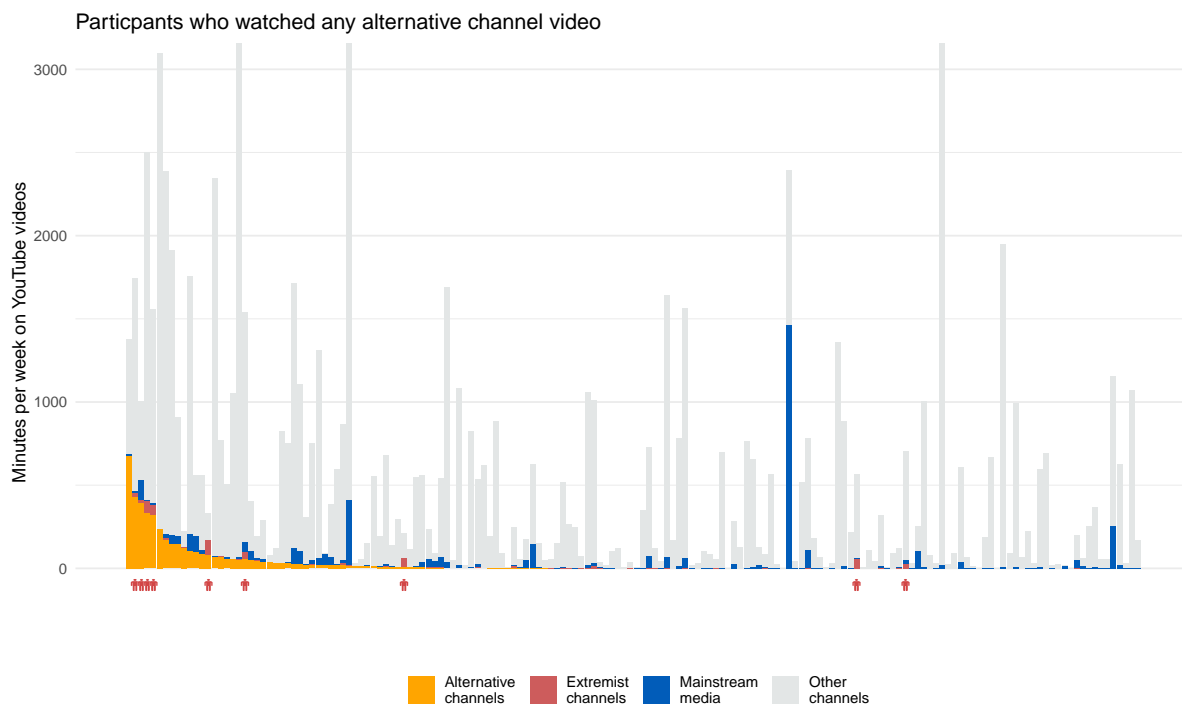

All results incorporate survey weights (N=1,181).

Figure S4: YouTube video diets of individuals who viewed any extremist channel video

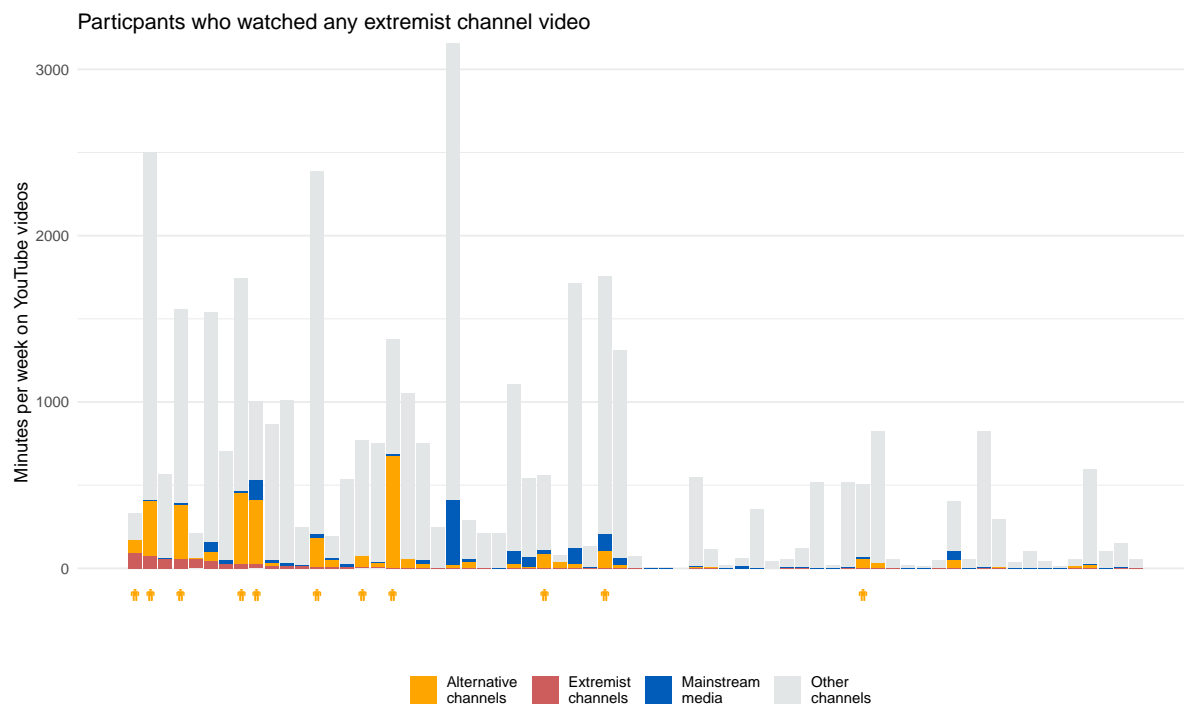

All results incorporate survey weights (N=1,181).

## Alternative and extremist superconsumers

Figure S5 presents watch time totals for the people responsible for 80% of the viewership of videos from alternative and extremist channels in our sample. We note two facts about superconsumers. First, they often watch a great deal of YouTube. Alternative channel superconsumers spend a median of 29 hours each week watching YouTube, while the median time that extremist channel superconsumers spend watching is 16 hours per week. By comparison, the median time per week across all participants is 0.2 hours. Second, there is substantial overlap between the two sets of superconsumers, who represent just 2% of all participants. Figures S3 and S4 show the YouTube video diets by channel type for individuals who viewed any alternative or extremist channel video during the study.

Figure S5: YouTube video diets of alternative and extremist superconsumers

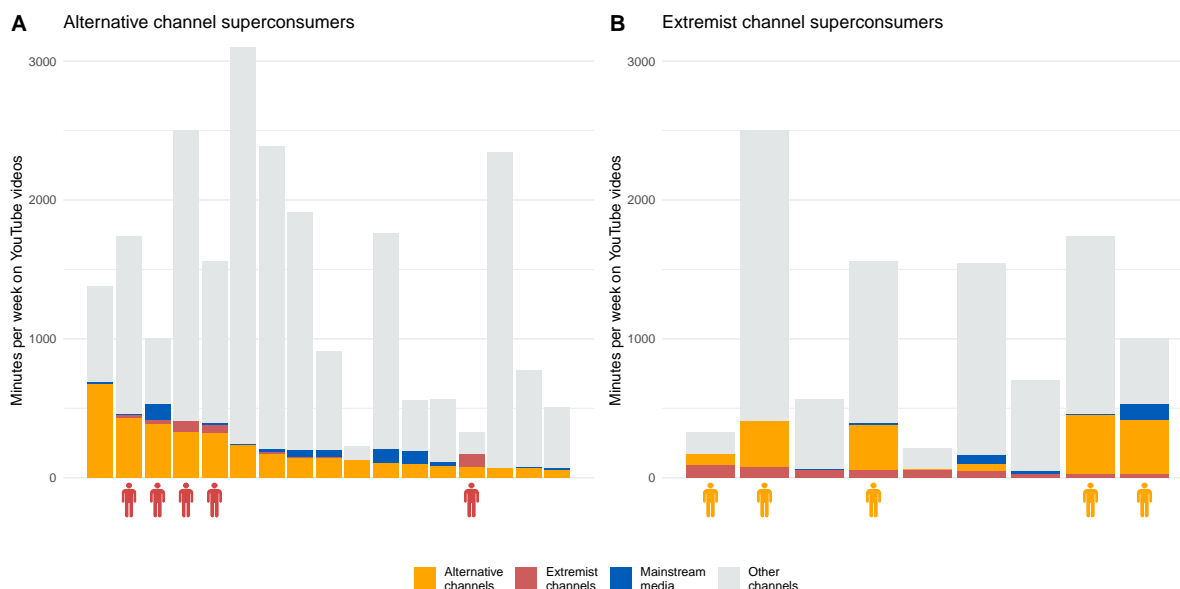

Total YouTube behavior of alternative (panel A) and extremist (panel B) superconsumers measured in minutes per week of video watch time (N=1,181). Each bar represents one individual and the height of the bar represents total view time of YouTube videos by channel type. The alternative superconsumers are ordered left to right by time spent on videos from alternative channels (orange portions of bars); the extremist superconsumers in the right panel are ordered left to right by time spent on videos from extremist channels (red portions of the bars). Red icons under bars in the left panel represent individuals who are also extremist superconsumers; orange icons under bars in the right panel represent individuals who are also alternative content superconsumers. All results incorporate survey weights.

# Additional data on recommendations and referrers

Figure S6: Recommendation follows by video channel type

**A) Percentage of total recommendations followed:**

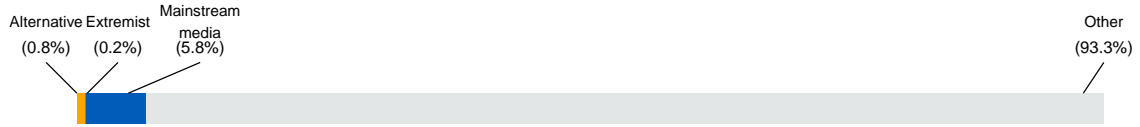

**B) Recommendations followed when watching:**

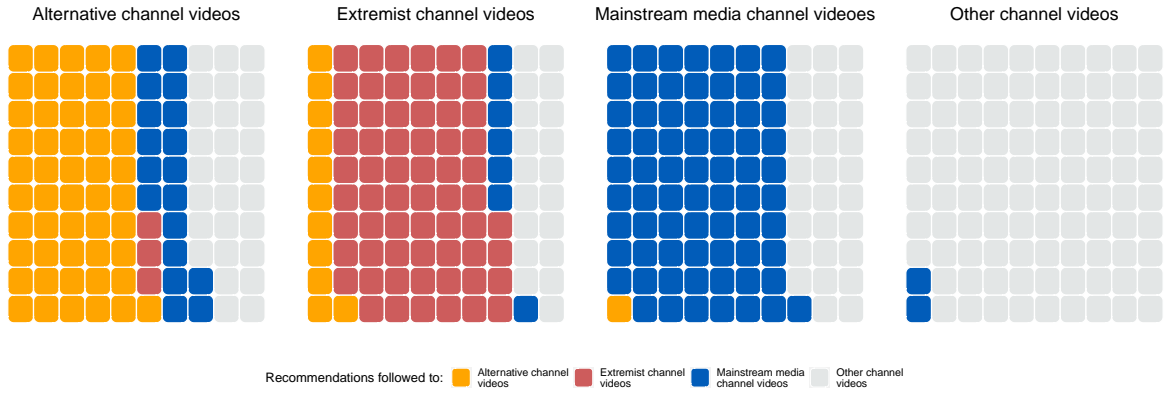

Number of colored tiles shown are proportional to the proportion of recommendations followed to each type of video when watching videos from alternative, extremist, mainstream media, or other channels (N=89,424). Results are based on the full set of recommendations that we could extract from each video and incorporate survey weights.



Figure S7: Pages viewed immediately prior to YouTube videos by channel type

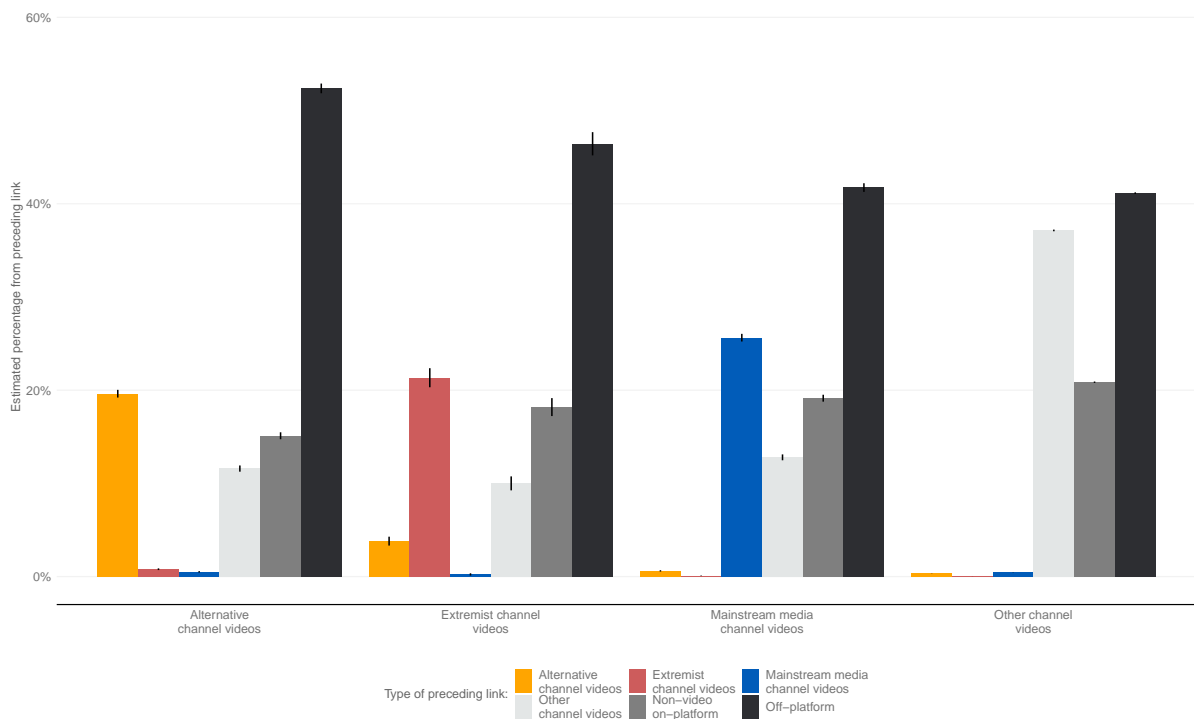

Weighted proportion of each type of URL recorded immediately before viewing a YouTube video of a given channel type (N=1,188,782). Observations where the preceding link was not a YouTube video are shown in the “non-video, on-platform” and “off-platform” bars. (“Non-video, on-platform” referrers combines YouTube channel pages, YouTube homepage, and YouTube search.)

## Additional regressions

The Poisson GLM for rates takes the form:

$$\log(\lambda_i) = \log(t_i) + \sum_{j=1}^p \beta_j x_{ij}$$

Let  $\lambda_i$  be either the expected number of minutes or the expected number of views of alternative, extremist, or mainstream media channel videos.  $t_i$  is the total number of weeks we have activity data for user  $i$ .  $j$  indexes the predictors (racial resentment, hostile sexism, feelings toward Jews, age, gender, education, and race). Due to overdispersion in the data, we relax the mean-variance equivalence assumption ( $Var[y|x] = \phi E[y|x]$ ) of Poisson models in which  $\phi$  (dispersion) is restricted to 1 and estimate  $\phi$  directly from the data through quasi-MLE.

Figure 3 in the main text and Table S2 below report quasipoisson estimates using this estimation approach for time spent on videos from alternative and extremist channels. Figure S8 and Table S3 report corresponding results from zero-inflated Poisson models in which the zero component is modelled with a Binomial regression and a secondary process generating the counts including zeros is governed by a Poisson model.

Table S2: Correlates of time on YouTube videos by channel type

|                   | <i>Dependent variable: Time elapsed</i> |                                    |                                     |
|-------------------|-----------------------------------------|------------------------------------|-------------------------------------|
|                   | Alternative<br>channel videos<br>(1)    | Extremist<br>channel videos<br>(2) | Mainstream<br>channel videos<br>(3) |
| Hostile sexism    | 1.71***<br>(0.37)                       | 1.60**<br>(0.60)                   | 0.00<br>(0.32)                      |
| Racial resentment | 0.19<br>(0.35)                          | 0.09<br>(0.43)                     | -0.42<br>(0.36)                     |
| Feeling Jews      | -0.01<br>(0.01)                         | -0.00<br>(0.01)                    | 0.00<br>(0.02)                      |
| Age               | 0.03<br>(0.02)                          | 0.05**<br>(0.02)                   | 0.04***<br>(0.01)                   |
| Male              | 1.01<br>(1.00)                          | 0.74<br>(1.03)                     | 0.85<br>(0.63)                      |
| Non-white         | -0.79<br>(0.98)                         | -1.30<br>(0.89)                    | 1.50<br>(0.84)                      |
| Some college      | 0.72<br>(0.95)                          | 0.50<br>(0.97)                     | 1.60*<br>(0.64)                     |
| Bachelor's degree | 1.98*<br>(0.98)                         | 1.79*<br>(0.77)                    | 2.43***<br>(0.71)                   |
| Post-grad         | -0.52<br>(1.03)                         | -1.99<br>(1.04)                    | 2.62***<br>(0.74)                   |
| Intercept         | -8.06***<br>(2.04)                      | -10.73***<br>(2.56)                | -3.12<br>(2.07)                     |
| N                 | 851                                     | 851                                | 851                                 |

\*\*\* $p < 0.001$ ; \*\* $p < 0.01$ ; \* $p < 0.05$

Quasipoisson coefficients for correlates of time per week spent on videos from alternative, extremist, and mainstream media channels. Robust standard errors are in parentheses.

Figure S8: Zero-inflated models on correlates of time on YouTube video by channel type

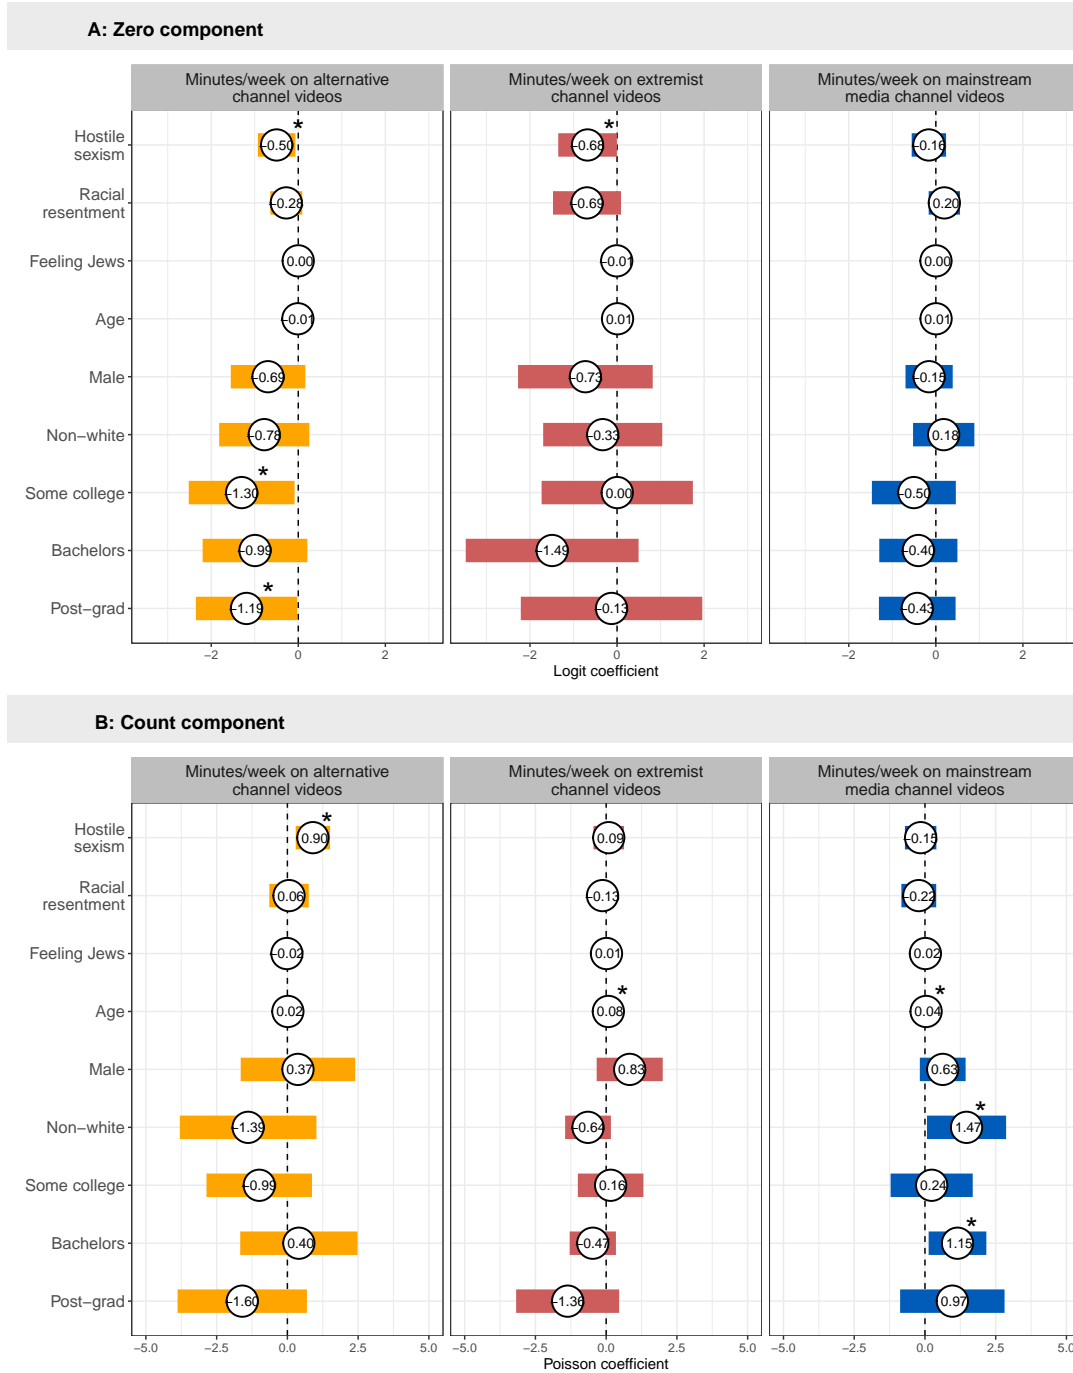

Zero-inflated Poisson coefficients for correlates of the time per week spent on videos from alternative, extremist, and mainstream media channels (N=851). Figure includes 95% confidence intervals calculated from robust standard errors. All results incorporate survey weights. Stars indicate coefficients that are significant at the  $p < .05$  level. See Table S3 for the regression table.

Table S3: Zero-inflated Poisson models for correlates of time on YouTube video by channel type

| <i>Dependent variable: Time elapsed</i> |                                      |                                    |                                     |
|-----------------------------------------|--------------------------------------|------------------------------------|-------------------------------------|
|                                         | Alternative<br>channel videos<br>(1) | Extremist<br>channel videos<br>(2) | Mainstream<br>channel videos<br>(3) |
| <b>Zero component</b>                   |                                      |                                    |                                     |
| Hostile sexism                          | -0.50*<br>(0.22)                     | -0.68*<br>(0.34)                   | -0.16<br>(0.20)                     |
| Racial resentment                       | -0.28<br>(0.19)                      | -0.69<br>(0.40)                    | 0.20<br>(0.18)                      |
| Feeling Jews                            | -0.00<br>(0.01)                      | -0.01<br>(0.01)                    | 0.00<br>(0.01)                      |
| Age                                     | -0.01<br>(0.01)                      | 0.01<br>(0.02)                     | 0.01<br>(0.01)                      |
| Male                                    | -0.69<br>(0.44)                      | -0.73<br>(0.79)                    | -0.15<br>(0.28)                     |
| Non-white                               | -0.78<br>(0.53)                      | -0.33<br>(0.70)                    | 0.18<br>(0.36)                      |
| Some college                            | -1.30*<br>(0.62)                     | 0.00<br>(0.89)                     | -0.50<br>(0.49)                     |
| Bachelor's degree                       | -0.99<br>(0.61)                      | -1.49<br>(1.01)                    | -0.40<br>(0.46)                     |
| Post-grad                               | -1.19*<br>(0.59)                     | -0.13<br>(1.06)                    | -0.43<br>(0.45)                     |
| Intercept                               | 6.88***<br>(1.11)                    | 9.34***<br>(1.79)                  | 1.00<br>(1.04)                      |
| <b>Count component</b>                  |                                      |                                    |                                     |
| Hostile sexism                          | 0.90**<br>(0.31)                     | 0.09<br>(0.28)                     | -0.15<br>(0.28)                     |
| Racial resentment                       | 0.06<br>(0.36)                       | -0.13<br>(0.21)                    | -0.22<br>(0.31)                     |
| Feeling Jews                            | -0.02<br>(0.01)                      | 0.01<br>(0.02)                     | 0.02<br>(0.02)                      |
| Age                                     | 0.02<br>(0.02)                       | 0.08***<br>(0.02)                  | 0.04**<br>(0.01)                    |
| Male                                    | 0.37<br>(1.03)                       | 0.83<br>(0.59)                     | 0.63<br>(0.41)                      |
| Non-white                               | -1.39<br>(1.23)                      | -0.64<br>(0.41)                    | 1.47*<br>(0.71)                     |
| Some college                            | -0.99<br>(0.95)                      | 0.16<br>(0.59)                     | 0.24<br>(0.74)                      |
| Bachelor's degree                       | 0.40<br>(1.06)                       | -0.47<br>(0.42)                    | 1.15*<br>(0.52)                     |
| Post-grad                               | -1.60<br>(1.16)                      | -1.36<br>(0.93)                    | 0.97<br>(0.94)                      |
| Intercept                               | 0.27<br>(1.69)                       | -5.06*<br>(2.03)                   | -4.00*<br>(1.66)                    |
| N                                       | 851                                  | 851                                | 851                                 |

Zero-inflated Poisson coefficients for correlates of the time per week spent on videos from alternative, extremist, and mainstream media channels. Robust standard errors are in parentheses.\*\*\* $p < 0.001$ ; \*\* $p < 0.01$ ; \* $p < 0.05$

Figure S9 and Table S4 instead report quasipoisson estimates for the number of views of videos from alternative, extremist, and mainstream media channels (rather than time spent).

Figure S9: Correlates of YouTube video views by channel type

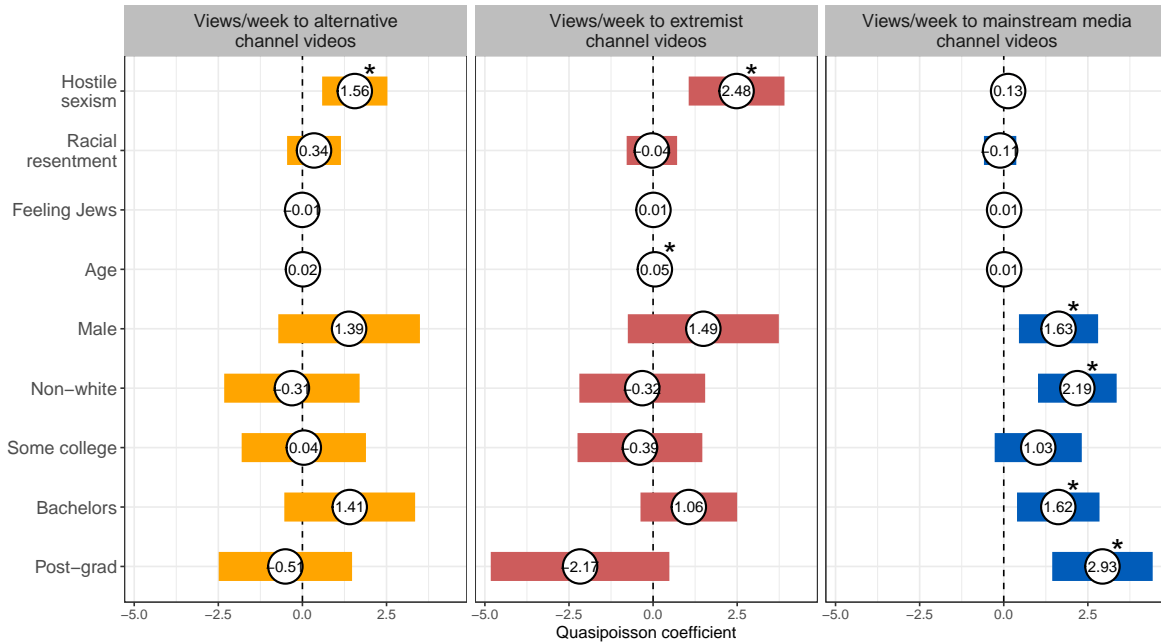

Quasipoisson regression coefficients for correlates of the number of respondent views per week of videos from alternative, extremist, and mainstream media channels (N=851). Figure includes 95% confidence intervals calculated from robust standard errors. All results incorporate survey weights. Stars indicate coefficients that are significant at the  $p < .05$  level. See Table S4 for the regression table.

Table S4: Correlates of YouTube video views by channel type

|                   | <i>Dependent variable: Views</i> |                     |                    |
|-------------------|----------------------------------|---------------------|--------------------|
|                   | Alternative<br>(1)               | Extremist<br>(2)    | Mainstream<br>(3)  |
| Hostile sexism    | 1.56**<br>(0.50)                 | 2.48***<br>(0.73)   | 0.13<br>(0.16)     |
| Racial resentment | 0.34<br>(0.41)                   | -0.04<br>(0.38)     | -0.11<br>(0.25)    |
| Feeling Jews      | -0.01<br>(0.01)                  | 0.01<br>(0.01)      | 0.01<br>(0.01)     |
| Age               | 0.02<br>(0.02)                   | 0.05**<br>(0.02)    | 0.01<br>(0.01)     |
| Male              | 1.39<br>(1.07)                   | 1.49<br>(1.15)      | 1.63**<br>(0.60)   |
| Non-white         | -0.31<br>(1.03)                  | -0.32<br>(0.95)     | 2.19***<br>(0.60)  |
| Some college      | 0.04<br>(0.94)                   | -0.39<br>(0.95)     | 1.03<br>(0.66)     |
| Bachelor's degree | 1.41<br>(0.99)                   | 1.06<br>(0.73)      | 1.62**<br>(0.63)   |
| Post-grad         | -0.51<br>(1.01)                  | -2.17<br>(1.35)     | 2.93***<br>(0.76)  |
| Intercept         | -8.75***<br>(2.62)               | -16.15***<br>(4.46) | -4.64***<br>(1.38) |
| N                 | 851                              | 851                 | 851                |

\*\*\* $p < 0.001$ ; \*\* $p < 0.01$ ; \* $p < 0.05$

Quasipoisson coefficients for correlates of views per week spent on videos from alternative, extremist, and mainstream media channels. Robust standard errors are in parentheses.

Due to concerns about post-treatment bias, we omit controls for party identification from the models reported in the main text. However, Figure S10 (Table S5) reports quasipoisson results mirroring those in Fig. 3 (Table S2) and Fig. S9 (Table S4) but which additionally control for Democratic and Republican self-identification (including leaners).

Table S5: Correlates of YouTube video exposure by channel type (with party controls)

|                   | <i>Dependent variable: Views</i> |                   |                   | <i>Dependent variable: Time elapsed</i> |                  |                   |
|-------------------|----------------------------------|-------------------|-------------------|-----------------------------------------|------------------|-------------------|
|                   | Alternative (1)                  | Extremist (2)     | Mainstream (3)    | Alternative (4)                         | Extremist (5)    | Mainstream (6)    |
| Hostile sexism    | 1.01<br>(0.64)                   | 1.24*<br>(0.60)   | 0.19<br>(0.15)    | 1.51*<br>(0.64)                         | 0.75<br>(0.49)   | -0.01<br>(0.33)   |
| Racial resentment | 1.21*<br>(0.56)                  | 1.23<br>(0.79)    | 0.04<br>(0.46)    | 0.83<br>(0.54)                          | 0.83<br>(0.82)   | -0.44<br>(0.53)   |
| Feeling Jews      | -0.01<br>(0.01)                  | -0.00<br>(0.01)   | 0.02<br>(0.01)    | -0.01<br>(0.01)                         | -0.01<br>(0.01)  | 0.01<br>(0.02)    |
| Democrat          | -1.48*<br>(0.64)                 | -0.86<br>(1.51)   | 1.26<br>(1.22)    | -1.51*<br>(0.71)                        | -1.79<br>(1.07)  | 0.04<br>(0.99)    |
| Republican        | -1.85*<br>(0.82)                 | -0.56<br>(1.31)   | 0.38<br>(0.92)    | -2.35**<br>(0.83)                       | -0.75<br>(1.34)  | 0.09<br>(0.71)    |
| Age               | -0.00<br>(0.03)                  | 0.02<br>(0.03)    | 0.01<br>(0.01)    | 0.02<br>(0.03)                          | 0.03<br>(0.02)   | 0.04**<br>(0.01)  |
| Male              | 1.03<br>(0.98)                   | 0.69<br>(1.18)    | 1.99***<br>(0.57) | 0.59<br>(0.82)                          | 0.31<br>(1.12)   | 0.95<br>(0.68)    |
| Non-white         | 0.09<br>(1.07)                   | 0.23<br>(0.93)    | 2.13***<br>(0.61) | -0.42<br>(0.96)                         | -0.93<br>(0.94)  | 1.45<br>(0.85)    |
| Some college      | 0.01<br>(0.91)                   | -0.39<br>(0.91)   | 0.61<br>(0.59)    | 0.67<br>(0.92)                          | 0.39<br>(0.83)   | 1.48*<br>(0.70)   |
| Bachelor's degree | 0.78<br>(1.27)                   | -0.92<br>(0.86)   | 1.38*<br>(0.63)   | 1.51<br>(1.22)                          | 0.83<br>(1.02)   | 2.45***<br>(0.72) |
| Post-grad         | -0.55<br>(1.22)                  | -1.67<br>(0.91)   | 2.69***<br>(0.62) | -0.40<br>(1.28)                         | -1.74*<br>(0.85) | 2.62***<br>(0.71) |
| Intercept         | -7.73*<br>(3.03)                 | -12.39*<br>(5.18) | -6.53*<br>(2.78)  | -4.12<br>(3.23)                         | -3.62<br>(3.70)  | 0.92<br>(2.40)    |
| N                 | 847                              | 847               | 847               | 847                                     | 847              | 847               |

\*\*\* $p < 0.001$ ; \*\* $p < 0.01$ ; \* $p < 0.05$

Quasipoisson models for correlates of views and time per week spent on videos from alternative, extremist, and mainstream media channels. Robust standard errors are in parentheses. All results incorporate survey weights.

Figure S10: Correlates of YouTube video exposure by channel type (with party controls)

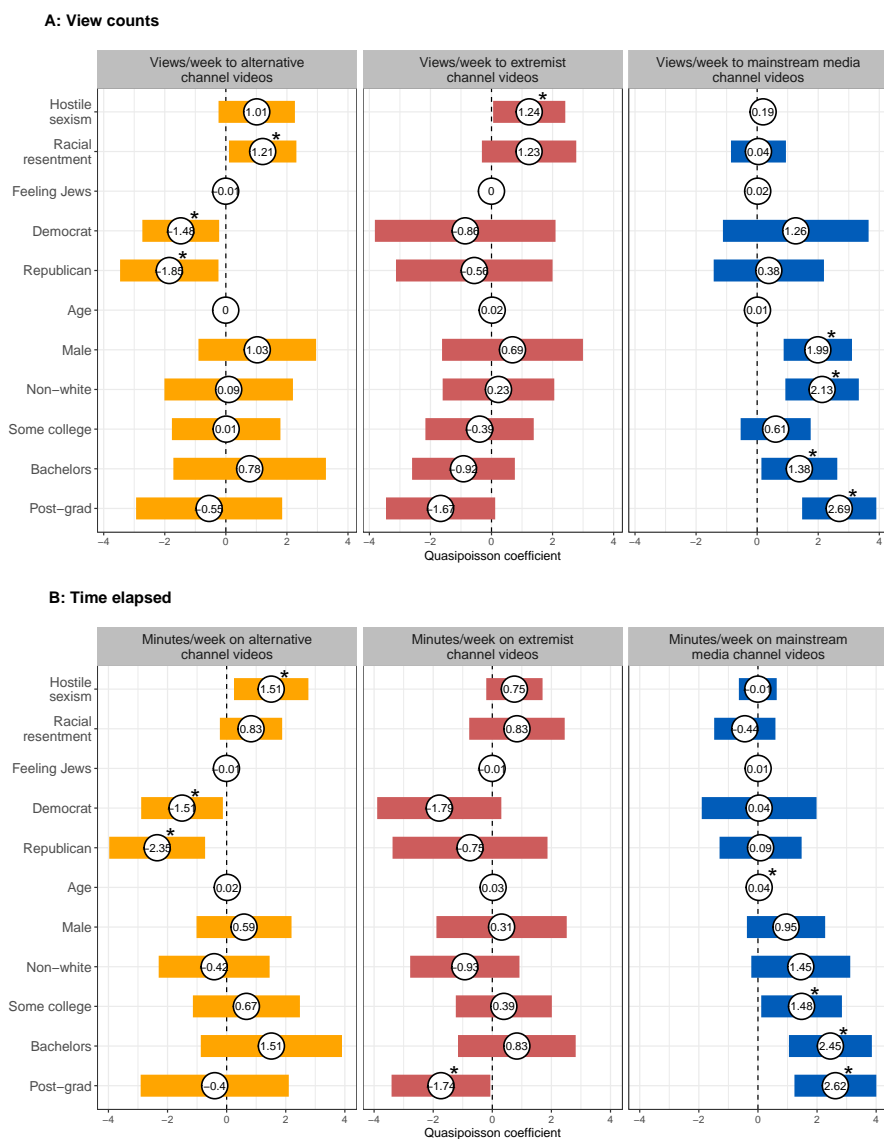

Quasipoisson regression coefficients for correlates of the number of respondent video views per week (panel A) and time spent (panel B) per week on videos from alternative, extremist, and mainstream media channels (N=847). Figure includes 95% confidence intervals calculated from robust standard errors. All results incorporate survey weights. See Table S5 for the regression table.



Tables S6 and S7 report quasipoisson estimates in which racial resentment and hostile sexism are entered into separate models rather than jointly as presented above.

Table S6: Correlates of time spent on YouTube videos by channel type (separating hostile sexism and racial resentment)

|                   | <i>Dependent variable: Time elapsed</i> |                   |                          |                  |                           |                   |
|-------------------|-----------------------------------------|-------------------|--------------------------|------------------|---------------------------|-------------------|
|                   | Alternative channel videos              |                   | Extremist channel videos |                  | Mainstream channel videos |                   |
|                   | (1)                                     | (2)               | (3)                      | (4)              | (5)                       | (6)               |
| Hostile sexism    | 1.80***<br>(0.23)                       |                   | 1.64***<br>(0.49)        |                  | -0.35<br>(0.27)           |                   |
| Racial resentment |                                         | 1.01***<br>(0.29) |                          | 0.90**<br>(0.30) |                           | -0.42<br>(0.25)   |
| Feeling Jews      | -0.01<br>(0.01)                         | -0.02*<br>(0.01)  | -0.00<br>(0.01)          | -0.00<br>(0.01)  | 0.00<br>(0.02)            | 0.00<br>(0.02)    |
| Age               | 0.03<br>(0.02)                          | 0.02<br>(0.02)    | 0.05**<br>(0.01)         | 0.04*<br>(0.02)  | 0.04**<br>(0.01)          | 0.04**<br>(0.01)  |
| Male              | 0.98<br>(1.01)                          | 1.50<br>(0.97)    | 0.74<br>(1.03)           | 1.23<br>(1.10)   | 0.88<br>(0.60)            | 0.86<br>(0.63)    |
| Non-white         | -0.82<br>(0.99)                         | -1.08<br>(0.89)   | -1.28<br>(0.88)          | -1.64<br>(0.88)  | 1.47<br>(0.81)            | 1.50<br>(0.84)    |
| Some college      | 0.69<br>(0.98)                          | 0.87<br>(0.89)    | 0.48<br>(0.95)           | 0.68<br>(0.96)   | 1.57*<br>(0.68)           | 1.60*<br>(0.64)   |
| Bachelor's degree | 1.97*<br>(0.98)                         | 1.86<br>(1.01)    | 1.76*<br>(0.83)          | 1.71<br>(0.90)   | 2.45***<br>(0.71)         | 2.43***<br>(0.72) |
| Post-grad         | -0.61<br>(1.01)                         | -0.52<br>(0.99)   | -2.10*<br>(0.95)         | -1.89*<br>(0.81) | 2.74***<br>(0.69)         | 2.62***<br>(0.73) |
| Intercept         | -3.62<br>(2.21)                         | 0.00<br>(1.47)    | -6.41*<br>(3.09)         | -3.39*<br>(1.34) | 0.96<br>(1.98)            | 0.98<br>(2.10)    |
| N                 | 851                                     | 851               | 851                      | 851              | 851                       | 851               |

\*\*\* $p < 0.001$ ; \*\* $p < 0.01$ ; \* $p < 0.05$

Quasipoisson coefficients for correlates of time per week spent on videos from alternative, extremist, and mainstream media channels. Robust standard errors are in parentheses. All results incorporate survey weights.

Table S7: Correlates of visits to YouTube videos by channel type (separating hostile sexism and racial resentment)

|                   | <i>Dependent variable: Views</i> |                    |                          |                    |                           |                   |
|-------------------|----------------------------------|--------------------|--------------------------|--------------------|---------------------------|-------------------|
|                   | Alternative channel videos       |                    | Extremist channel videos |                    | Mainstream channel videos |                   |
|                   | (1)                              | (2)                | (3)                      | (4)                | (5)                       | (6)               |
| Hostile sexism    | 1.74***<br>(0.29)                |                    | 2.47***<br>(0.69)        |                    | 0.04<br>(0.16)            |                   |
| Racial resentment |                                  | 1.11***<br>(0.32)  |                          | 0.90**<br>(0.32)   |                           | -0.00<br>(0.19)   |
| Feeling Jews      | -0.01<br>(0.01)                  | -0.01<br>(0.01)    | 0.01<br>(0.01)           | 0.01<br>(0.02)     | 0.01<br>(0.01)            | 0.01<br>(0.01)    |
| Age               | 0.02<br>(0.02)                   | 0.01<br>(0.02)     | 0.05**<br>(0.02)         | 0.04*<br>(0.02)    | 0.01<br>(0.01)            | 0.01<br>(0.01)    |
| Male              | 1.32<br>(1.07)                   | 1.77<br>(0.97)     | 1.49<br>(1.15)           | 1.84<br>(1.16)     | 1.62**<br>(0.59)          | 1.64**<br>(0.58)  |
| Non-white         | -0.36<br>(1.05)                  | -0.57<br>(0.95)    | -0.33<br>(0.92)          | -1.09<br>(1.01)    | 2.17***<br>(0.60)         | 2.19***<br>(0.59) |
| Some college      | -0.04<br>(1.02)                  | 0.22<br>(0.86)     | -0.38<br>(0.95)          | -0.25<br>(1.05)    | 1.03<br>(0.66)            | 1.04<br>(0.66)    |
| Bachelor's degree | 1.37<br>(0.98)                   | 1.31<br>(1.01)     | 1.08<br>(0.88)           | 1.04<br>(1.05)     | 1.63**<br>(0.63)          | 1.61**<br>(0.63)  |
| Post-grad         | -0.62<br>(0.97)                  | -0.38<br>(0.86)    | -2.10<br>(1.18)          | -1.54<br>(0.91)    | 2.96***<br>(0.71)         | 2.95***<br>(0.75) |
| Intercept         | -8.23**<br>(2.66)                | -5.14***<br>(1.40) | -16.26**<br>(4.99)       | -9.07***<br>(1.96) | -4.60***<br>(1.37)        | -4.47**<br>(1.44) |
| N                 | 851                              | 851                | 851                      | 851                | 851                       | 851               |

\*\*\* $p < 0.001$ ; \*\* $p < 0.01$ ; \* $p < 0.05$

Quasipoisson coefficients for correlates of visits per week on videos from alternative, extremist, and mainstream media channels. Robust standard errors are in parentheses. All results incorporate survey weights.

Finally, we provide results in Fig. S11 and Table S8 below in which we use survey respondents' prior responses to two questions measuring denial of institutional racism (42) in the 2018 Cooperative Congressional Survey as an alternate measure of racial attitudes. Our findings are similar to those reported above using prior levels of racial resentment instead.

Table S8: Correlates of exposure to YouTube videos by channel type (with alternative racial resentment)

|                   | <i>Dependent variable: Views</i> |                    |                    | <i>Dependent variable: Time elapsed</i> |                   |                   |
|-------------------|----------------------------------|--------------------|--------------------|-----------------------------------------|-------------------|-------------------|
|                   | Alternative<br>(1)               | Extremist<br>(2)   | Mainstream<br>(3)  | Alternative<br>(4)                      | Extremist<br>(5)  | Mainstream<br>(6) |
| Hostile sexism    | 1.52**<br>(0.49)                 | 2.32**<br>(0.79)   | 0.10<br>(0.21)     | 1.65***<br>(0.40)                       | 1.38<br>(0.75)    | -0.28<br>(0.44)   |
| Denial of racism  | 0.34<br>(0.31)                   | 0.25<br>(0.43)     | -0.10<br>(0.18)    | 0.22<br>(0.29)                          | 0.41<br>(0.45)    | -0.10<br>(0.33)   |
| Feeling Jews      | -0.01<br>(0.01)                  | 0.01<br>(0.01)     | 0.01<br>(0.01)     | -0.01<br>(0.01)                         | -0.00<br>(0.01)   | 0.00<br>(0.02)    |
| Age               | 0.02<br>(0.02)                   | 0.06**<br>(0.02)   | 0.01<br>(0.01)     | 0.03<br>(0.02)                          | 0.05***<br>(0.01) | 0.04**<br>(0.01)  |
| Male              | 1.33<br>(1.01)                   | 1.55<br>(1.13)     | 1.63**<br>(0.59)   | 1.03<br>(0.98)                          | 0.85<br>(1.00)    | 0.88<br>(0.59)    |
| Non-white         | -0.23<br>(0.99)                  | -0.27<br>(0.88)    | 2.17***<br>(0.60)  | -0.71<br>(0.93)                         | -1.17<br>(0.83)   | 1.47<br>(0.82)    |
| Some college      | -0.09<br>(0.94)                  | -0.41<br>(0.90)    | 1.02<br>(0.66)     | 0.62<br>(0.96)                          | 0.36<br>(0.89)    | 1.57*<br>(0.68)   |
| Bachelor's degree | 1.30<br>(1.01)                   | 1.13<br>(0.84)     | 1.63**<br>(0.63)   | 1.90<br>(0.99)                          | 1.73*<br>(0.88)   | 2.45***<br>(0.71) |
| Post-grad         | -0.52<br>(0.95)                  | -1.80<br>(0.97)    | 2.93***<br>(0.70)  | -0.56<br>(1.02)                         | -1.87*<br>(0.81)  | 2.72***<br>(0.68) |
| Intercept         | -8.46**<br>(2.73)                | -16.72**<br>(5.33) | -4.58***<br>(1.38) | -3.76<br>(2.27)                         | -6.94*<br>(3.22)  | 0.98<br>(2.04)    |
| N                 | 851                              | 851                | 851                | 851                                     | 851               | 851               |

\*\*\* $p < 0.001$ ; \*\* $p < 0.01$ ; \* $p < 0.05$

Quasipoisson coefficients for correlates of of views and time per week spent on videos from alternative, extremist, and mainstream media channels. Robust standard errors are in parentheses.

Figure S11: Correlates of exposure to YouTube videos by channel type (alternate racial attitude measure)

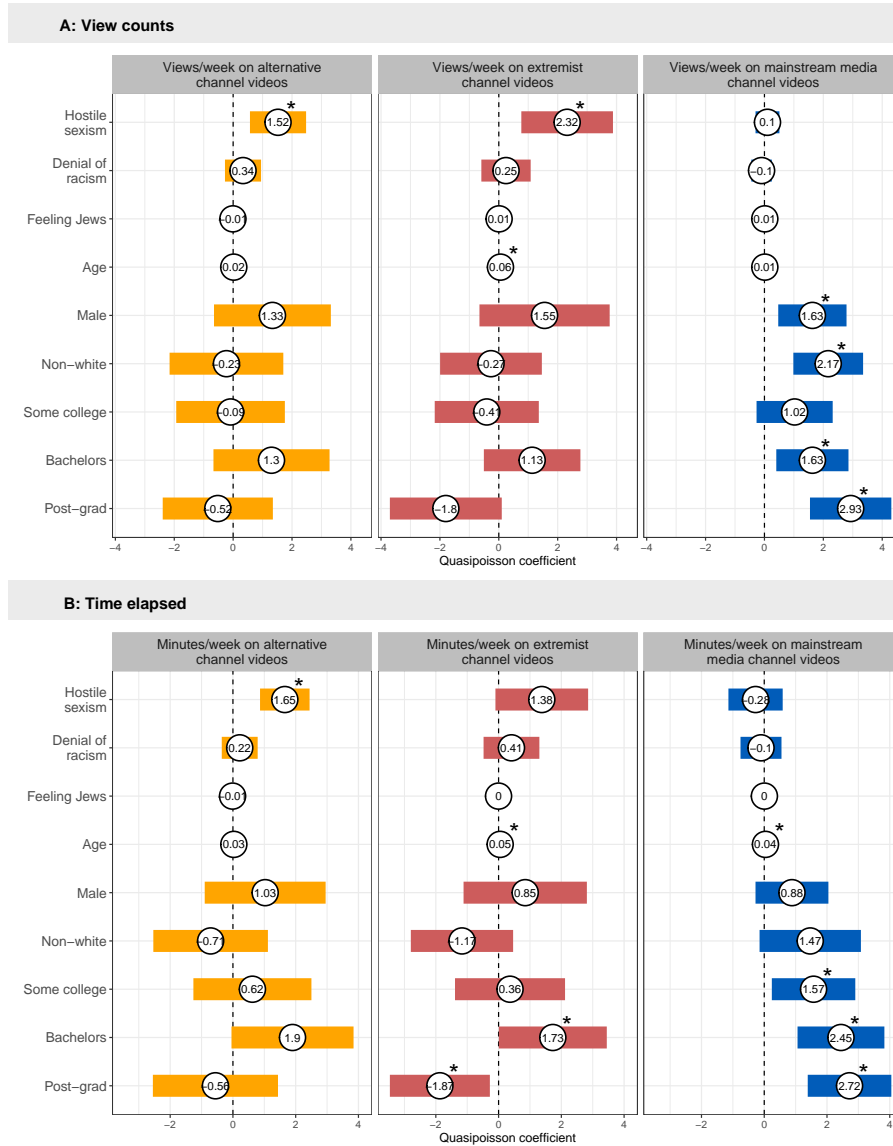

Quasipoisson regression coefficients for correlates of the number of respondent views and time spent per week on videos from alternative, extremist, and mainstream media channels (N=851). Figure includes 95% confidence intervals calculated from robust standard errors. All results incorporate survey weights. See Table S8 for regression table.

## Browser extension validation

Browser activity statistics are reported throughout the paper. Below, we evaluate the validity of browser activity by comparing it to browser history data. The browser extension also recorded participants' browser history (URLs with timestamps that are recorded each time a participant loads a new web page). For comparability, we limit browser history data to the period for which both browser history and activity data are available.

Figure S12 shows the Pearson correlation coefficients between browser history and activity data across five variables for alternative, extremist, mainstream media, and other YouTube channels: a binary measure of viewing any video from that type of channel, the total number of views of videos from that type of channel, the total number of views of videos from subscribed channels of that type, the number of seconds elapsed on all YouTube videos from channels of that type, and the number of seconds elapsed on all YouTube videos from channels of that type. Correlations range from  $r = 0.60$  to  $0.99$  and are consistently high for alternative channel videos ( $0.79 \leq r \leq 0.90$ ) and extremist channel videos ( $0.83 \leq r \leq 0.95$ ).

Figure S12: Correlation between browser history and activity

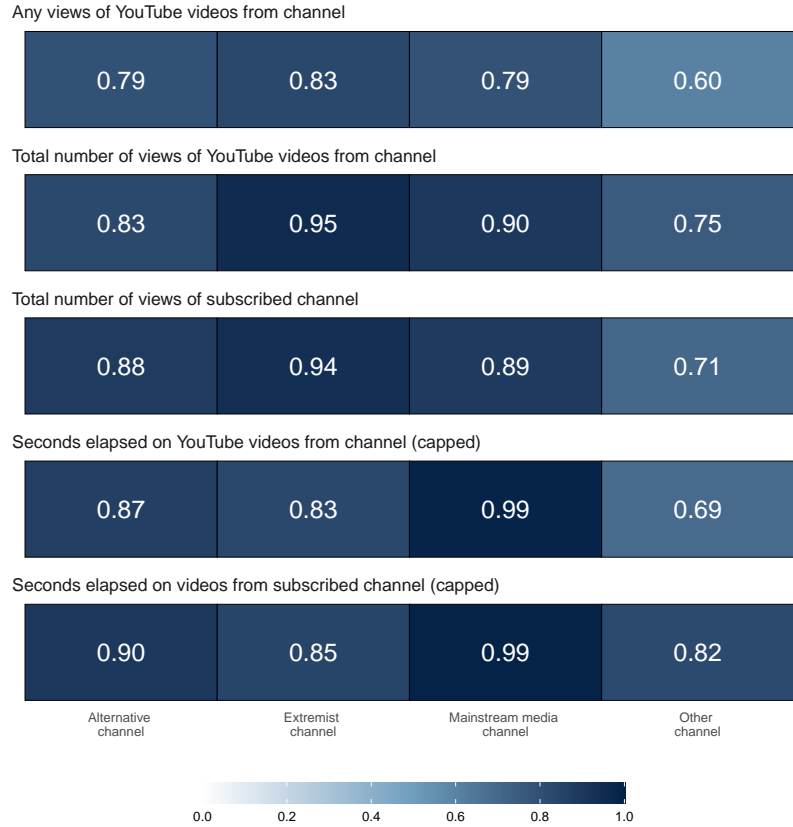

All results incorporate survey weights (N=1,181).

## Differential browsing behavior after install

As shown in Table S9 below, we find no discernible change in the proportion of time that participants spent on alternative or extremist channels after installing the extension. We performed this analysis to verify that participants did not modify their web browsing behavior after installation, an important consideration in validating our measurement approach. Leveraging browser history data, which captures three months of web activity prior to the installation of the extension, we test if the proportion of time participants spend on alternative and extremist channels changes after installation in levels or slopes. Using OLS with robust standard errors clustered by participant, we estimate the two-way fixed effects model in Equation 1 where  $\alpha_i$  is a participant-level fixed effect (for each  $i = 1, \dots, 1098$ ),  $\gamma_t$  is a day-level fixed effect (for  $t = \text{Apr. 22, 2020}, \dots, \text{Dec. 31, 2020}$ ), and  $Installed_{i,t}$  is a binary variable testing whether the mean proportion of time participants spend on alternative and extremist channels changes after installation. We also estimate the model in Equation 2 which adds the term  $Days\ after\ install_{i,t}$  to test for a linear time trend in alternative and extremist channel viewership after installation. The dependent variable in both models is the proportion of seconds spent on either alternative or extremist channel videos per day.

$$Y_{i,t} = \alpha_i + \gamma_t + \beta_1 Installed_{i,t} + \epsilon_{i,t} \quad (1)$$

$$Y_{i,t} = \alpha_i + \gamma_t + \beta_1 Installed_{i,t} + \beta_2 Days\ after\ install_{i,t} + \epsilon_{i,t} \quad (2)$$

Table S9: Predictors of proportion of time spent on alternative/extremist videos by day

|                    | (1)                  | (2)                   |
|--------------------|----------------------|-----------------------|
| Installed          | 0.00660<br>(0.00778) | 0.00627<br>(0.00789)  |
| Days after install |                      | -0.00013<br>(0.00210) |
| Day fixed effects  | ✓                    | ✓                     |
| User fixed effects | ✓                    | ✓                     |
| N                  | 63,216               | 63,216                |

OLS model results with robust standard errors clustered by participant in parentheses. Estimates include survey weights. \*p<0.1; \*\*p<0.05; \*\*\*p<0.01.

## Attitudes toward YouTube

Figure S13: Differences in perceptions of YouTube between full sample and extension sample

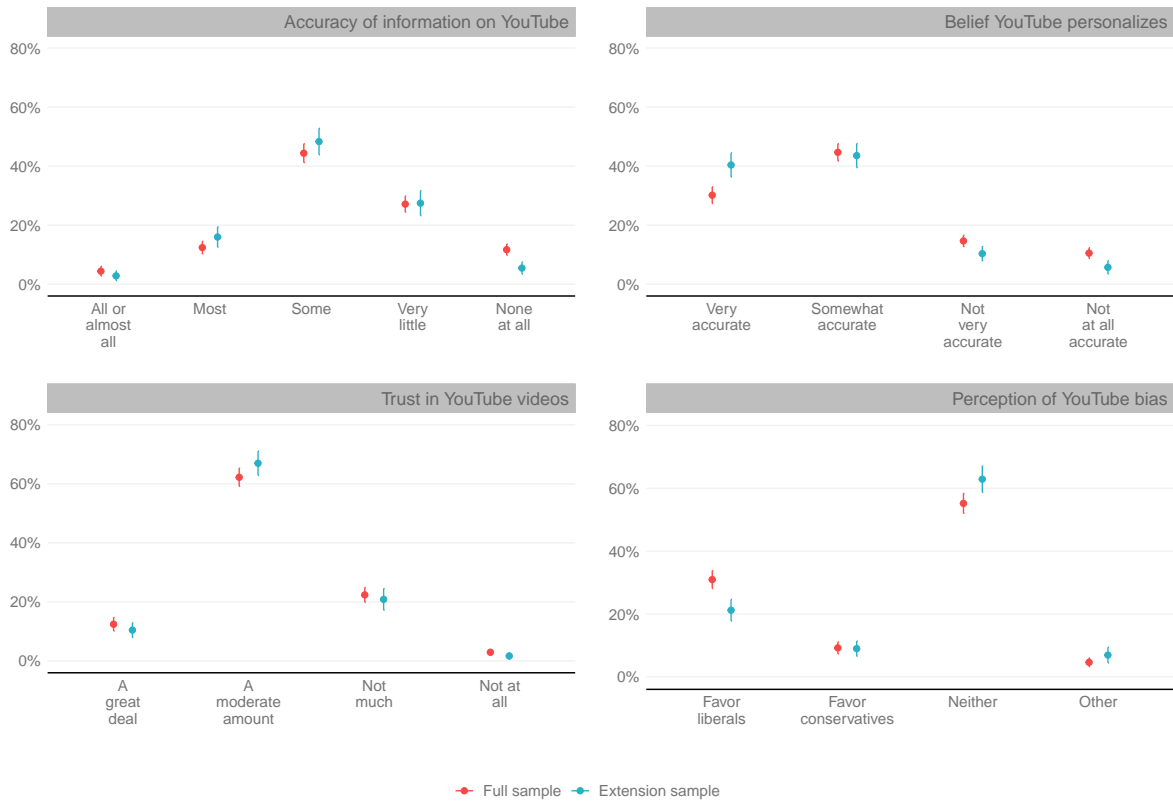

All results incorporate survey weights (N=4,000 for full sample and N=1,181 for extension sample).



## Session trajectories

We provide three examples of participant viewing paths that led to extremist channel videos in a manner consistent with the rabbit hole narrative below:

- A participant conducted a search for an alternative channel’s name (Dinesh D’Souza), viewed a video from that channel, and then followed a recommendation to an extremist channel video (PragerU).
- In another session, a participant visited the YouTube homepage, viewed a video from an “other” channel (English Heritage), then viewed a video from the alternative channel Carpe Donktum titled “Stop The Steal.us,” and then followed a recommendation to a video from the extremist channel Styxhexenhammer666 titled “MSM Hopes You’ll Just Accept the Election Despite Outstanding Evidence of Fraud.” Following that, the participant viewed a video from an “other” channel that is now private titled “Target Smart Early Voting Data Gives President Trump the Eventual Victory After Recounts.”
- A participant viewed an other channel video (WIRED; “Every Race In Middle-Earth Explained”) and then followed a recommendation to an extremist channel video (Survive the Jive, “Ancient History of Ireland, Newgrange, Celts, Vikings”).

To test for “rabbit hole”-style patterns of exposure, we also consider whether YouTube users are more likely to encounter potentially harmful content in longer sessions (20) We construct sessions by separating a sorted timeline of respondents’ YouTube activity at each point at which they (1) dwell on a non-video URL (e.g., the YouTube homepage) for greater than 10 minutes, (2) spend longer than the duration of the video in question plus 30 minutes before interacting with the page, or (3) spend longer than four hours on a video. We call the number of YouTube videos between these breakpoints a session and define each session by its length (number of videos viewed).

First, we note several descriptive findings about YouTube sessions. They are relatively numerous—the median number of sessions for a participant is 19.4 during the study period—and frequently short. In total, 18.6% of sessions on YouTube do not include a video view, 15% are singletons in which respondents view just one video, and 42.1% include 2–10 videos. Just 24.3% of sessions have length 11 or longer. However, due to skewness in the distribution of YouTube consumption by session length, 77% of videos are watched in these sessions of length eleven or greater.

Figure S14 considers how the probability of viewing an alternative or extremist channel video varies by the point in a session over sessions of length 1–319 (the range of lengths that capture 99% of the sessions in our data). Each point in the graph represents the estimated probability of viewing a particular type of video at a particular session length. We find no clear evidence that the probability of viewing an alternative or extremist channel video increases as sessions lengthen; the probabilities are generally stable. The equivalent probability for mainstream media channel videos, which we provide for comparison, is also relatively stable.

Figure S15 instead examines whether the *total* proportion of videos watched from alternative and extremist channels by session is greater in longer sessions. A point represents the percentage of videos of a particular type that were watched in sessions of a given total length. We find no evidence that longer sessions have higher proportions of alternative or extremist channel videos.

Figure S14: Percentage of views to each channel type by video number within session

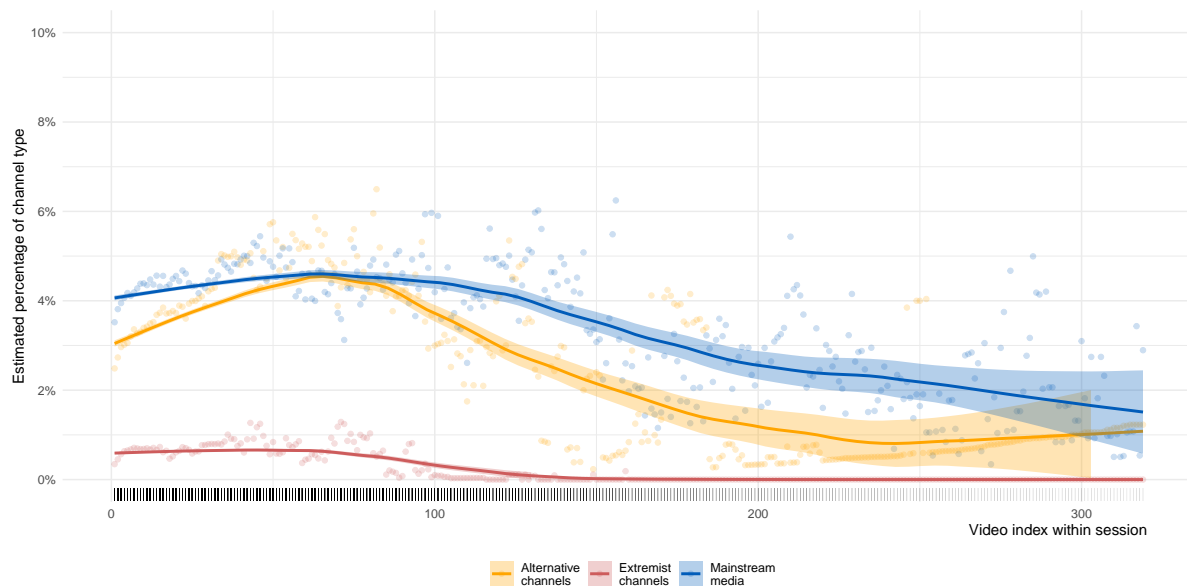

Each point represents the average percentage of videos from a channel type at a given session length (N=165,424). Lines are loess curves fit with a linear function and a 0.5 span. All results incorporate survey weights.

Figure S15: Percentage of views to each channel type by total session length

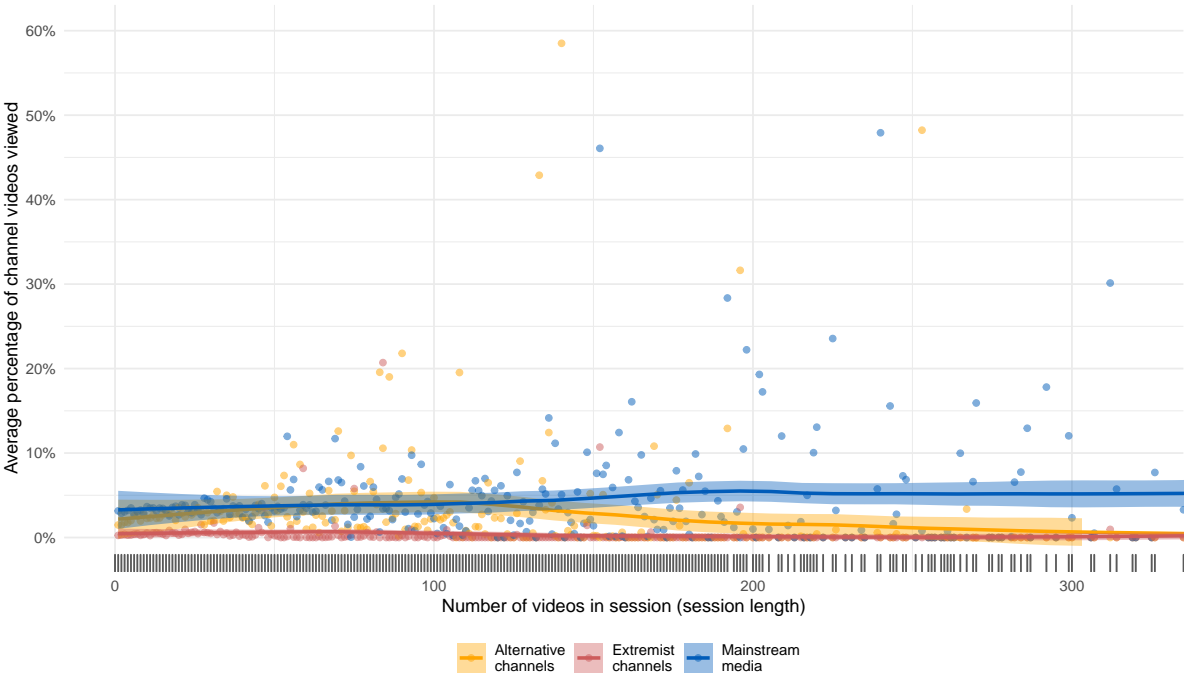

Each point represents the average percentage of videos from a channel type of all videos viewed in sessions of a fixed session length (N=165,424). Lines are loess curves fit with a linear function and a 0.5 span. All results incorporate survey weights.

## External referrers

Table S10: External referrers to alternative and extremist channel videos

| Referrer type        | Preceding domain      | % to extremist channel | % to alternative channel |
|----------------------|-----------------------|------------------------|--------------------------|
| Alternative social   | 4chan.org             | 0.000                  | 0.000                    |
|                      | banned.video          | 0.000                  | 0.008                    |
|                      | parler.com            | 0.159                  | 0.556                    |
|                      | gab.com               | 0.384                  | 0.476                    |
|                      | boards.4chan.org      | 1.524                  | 1.400                    |
|                      | boards.4channel.org   | 5.007                  | 2.116                    |
|                      | twitchy.com           | 14.154                 | 0.479                    |
| Mainstream social    | bumble.com            | 0.000                  | 0.035                    |
|                      | discord.com           | 0.000                  | 0.050                    |
|                      | pinterest.com         | 0.000                  | 0.017                    |
|                      | tumblr.com            | 0.000                  | 0.155                    |
|                      | twitch.tv             | 0.000                  | 1.040                    |
|                      | tinder.com            | 0.030                  | 0.245                    |
|                      | apps.facebook.com     | 0.160                  | 0.345                    |
|                      | instagram.com         | 0.238                  | 1.045                    |
|                      | messenger.com         | 0.506                  | 1.166                    |
|                      | linkedin.com          | 0.515                  | 0.069                    |
|                      | reddit.com            | 0.760                  | 3.555                    |
|                      | old.reddit.com        | 2.861                  | 3.497                    |
|                      | facebook.com          | 6.394                  | 8.527                    |
| twitter.com          | 12.095                | 14.975                 |                          |
| Search engine social | search.yahoo.com      | 0.000                  | 0.050                    |
|                      | yahoo.com             | 0.085                  | 0.076                    |
|                      | duckduckgo.com        | 0.402                  | 0.823                    |
|                      | bing.com              | 0.948                  | 0.700                    |
|                      | google.com            | 8.237                  | 8.033                    |
| Webmail              | mail.com              | 0.000                  | 0.064                    |
|                      | outlook.office.com    | 0.000                  | 0.010                    |
|                      | outlook.office365.com | 0.000                  | 0.014                    |
|                      | mail.aol.com          | 0.088                  | 0.217                    |
|                      | outlook.live.com      | 0.125                  | 0.285                    |
|                      | mail.yahoo.com        | 0.863                  | 1.444                    |
|                      | mail.google.com       | 2.289                  | 3.926                    |

All results incorporate survey weights.

## Exposure concentration by views

Figure S16: Concentration of exposure to alternative and extremist channels (view counts)

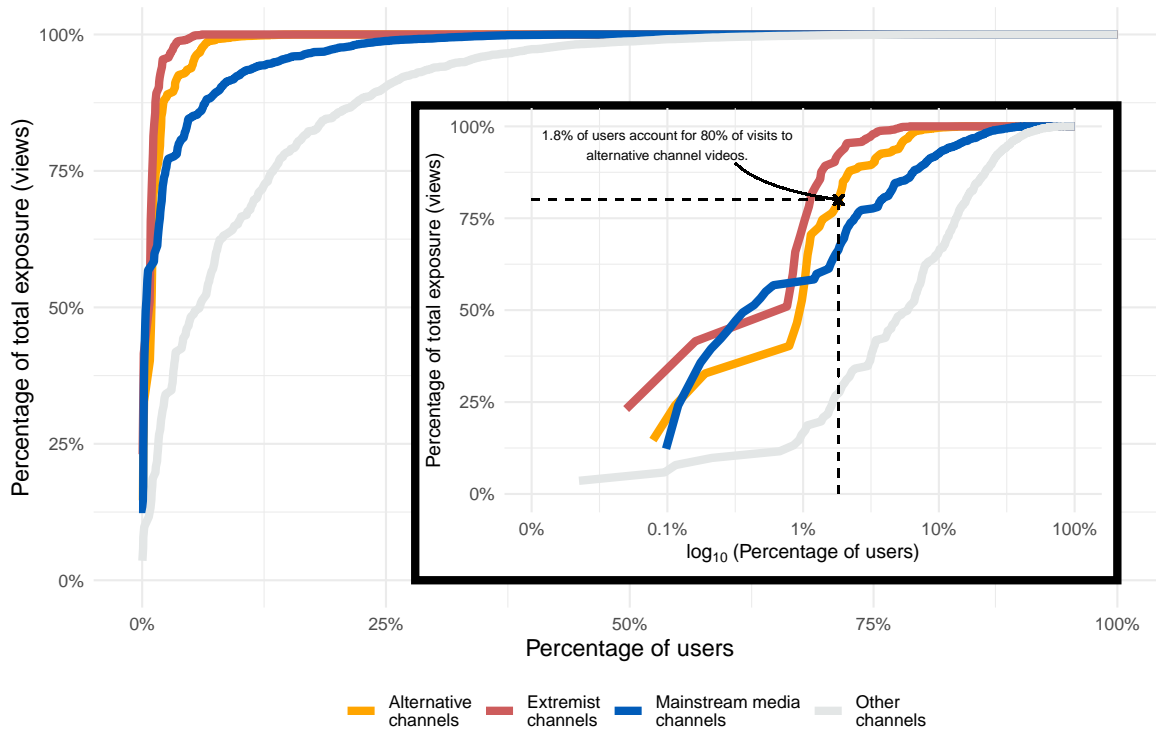

Weighted empirical cumulative distribution function showing the percentage of participants responsible for a given level of total observed video viewership of alternative and extremist channels on YouTube (by view count). All results incorporate survey weights (N=1,181).

## Recommendations seen and followed by rank

Figure S17: Recommendations seen by rank conditional on video channel type

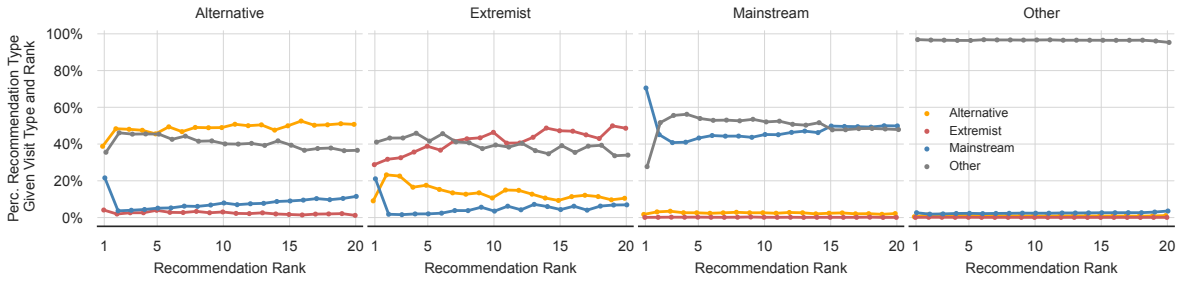

Video type recommended by rank when visiting a video of the channel type named at the top of the panel (N=10,423,890). The results incorporate survey weights.

Figure S18: Recommendations followed by rank conditional on video channel type

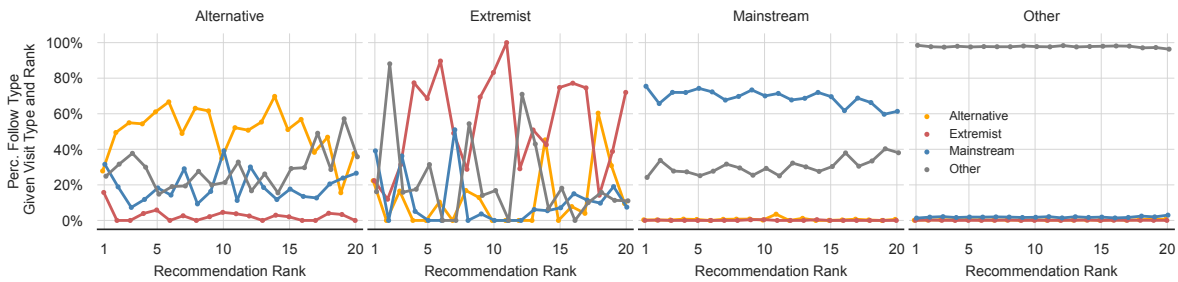

Video type recommendation follows by rank when visiting a video of the channel type named at the top of the panel (N=89,424). The results incorporate survey weights.

## Channel labeling criteria

In this appendix, we aggregate the methods used by the authors of prior work to identify and label specific YouTube channels.

### Ribeiro et al. (24)

Ribeiro et al. (24) used the following process to identify a set of channels:

(1) We choose a set of seed channels. Seeds were extracted from the I.D.W. unofficial website [7], Anti Defamation League’s report on the Alt-lite/the Alt-right [3] and Data & Society’s report on YouTube Radicalization [24]. We pick popular channels that are representative of the community we are interested in. Each seed was independently annotated two times and discarded in case there was any disagreement.

(2) We choose a set of keywords related to the sub-communities. For each keyword, we use YouTube’s search functionality and consider the first 200 results in English. We then add channels that broadly relate in topic to the community in question. For example, for the Alt-right, keywords included both terms associated with their narratives, such as The Jewish Question and White Genocide, as well as the names or nicknames of famous Alt-righters, such as weev and Christopher Cantwell.

(3) We iteratively search the related and featured channels collected in steps (1) and (2), adding relevant channels (as defined in 2). Note that these are two ways channel can link to each other. Featured channels may be chosen by YouTube content creators: if your friend has a channel and you want to support it, you can put it on your “Featured Channels” tab. Related channels are created by YouTube’s recommender system.

(4) We repeat step (3), iteratively collecting another hop of featured/recommended channels from those obtained in (3). The annotation process done here followed the same instructions as the one explained in detail for data collection step (c). Steps (2)–(4), were done by a co-author with more than 50 hours of watch-time of the communities of interest. Notice that, in steps (2)–(4), we are not labeling the channels, but creating a pool of channels to be further inspected and labeled in subsequent steps. The complete list of seeds obtained from (1) and of keywords used in (2) may be found in Appendix A. A clear distinction between featured and recommended channels may be found in Appendix B.

Ribeiro et al. used the following process to label and validate channels.

(c) Channel labeling was done in multiple steps. All channels are either seeds (Type 1) or obtained through YouTube’s recommendation/search engine (Types 2 and 3). Notice that Type 1 channels were assigned labels at the time of their collection. For the others, we had 2 of the authors annotate them carefully. They both had significant experience with the communities being studied, and were given the following instructions:

Carefully inspect each one of the channels in this table, taking a look at the most popular videos, and watching, altogether, at least 5 minutes

of content from that channel. Then you should decide if the channel belongs to the Alt-right, the Alt-lite, the Intellectual Dark Web (I.D.W.), or whether you think it doesn't fit any of the communities. To get a grasp on who belongs to the I.D.W., read [42], and check out the website with some of the alleged members of the group [7]. Yet, we ask you to consider the label holistically, including channels that have content from these creators and with a similar spirit to also belong in this category. To distinguish between the Alt-right and the Alt-lite, read [3] and [30]. It is important to stress the difference between civic nationalism and racial nationalism in that case. Please consider the Alt-right label only to the most extreme content. You are encouraged to search on the internet for the name of the content creator to help you make your decision.

The annotation process lasted for 3 weeks. In case they disagreed, they had to discuss the cases individually until a conclusion was reached. Interannotator agreement was of 75.57

## Ledwich and Zaitsev (26)

Ledwich and Zaitsev (26) explain how they labeled YouTube channels:

The tagging process allowed each channel to be characterized by a maximum of four different tags to create meaningful and fair categories for the content. In addition to labeling created by the two authors, we recruited an additional volunteer labeler, who was well versed in the YouTube political sphere, and whom we trusted to label channels by their existing content accurately. When two or more labelers defined a channel by the same label, that label was assigned to the channel. When the labelers disagreed and ended in a draw situation, the tag was not assigned. The majority was needed for a tag to be applied.

...

To assign a label, we investigated which topics the channels discussed and from which perspective...The only way to conduct this labeling was to watch the content on the channels until the labelers found enough evidence for assigning specific labels. For some channels, this was relatively straightforward: the channels had introductory videos that stated their political perspectives ... In other cases, the labelers could not assign a label based on introduction or description but had to watch several videos on the channel to determine the political leanings. On average, every labeler watched over 60 hours of YouTube videos to define the political leanings without miscategorizing the channel and thus misrepresenting the views of the content creators.

In their study, they label the following types of channels using the quoted criteria.

- **Anti-SJW:** “Channel has to have a significant focus on criticizing “Social Justice” (see next category) with a positive view of the marketplace of ideas and discussing controversial topics. To tag a channel, this should be a common focus in their content.” Raters had 74% agreement on channels of this type.



- **MRA:** “Focus on advocating for rights for men. See men as the oppressed sex and will focus on examples where men are currently oppressed. Incels, who identify as victims of sex inequality, would also be included in this category.” Raters had 97% agreement on channels of this type.
- **White Identitarian:** “Identifies-with/is-proud-of the superiority of “whites” and Western Civilization.” Raters had 94% agreement on channels of this type.

## Lewis (35)

Lewis (35) describes the following process for identifying and validating channels:

To understand the AIN in-depth, I analyzed both the content of YouTube influencers (that is, what they are saying) as well as their collaborations (who they are broadcasting with). The latter presented a significant research challenge, as YouTube does not provide metadata about guest appearances. To get around this, I manually collected data from each influencer’s video titles, and at times, video content, to determine each of the guests they hosted in their content between January 1, 2017 and April 1, 2018. I found new influencers through a snowball approach: for each guest on an influencer’s channel, I would visit their own channel (if one existed) to see who they, in turn, hosted.

Overall, I collected data for approximately 65 influencers across 81 channels . . . I watched content from each of these channels and performed an in-depth content analysis on the transcripts for two of them. Overall, I watched hundreds of hours of content from these 65 content creators.

At the time of data collection, this group of influencers was as close as I could get to a snapshot of the Alternative Influence Network. However, the boundaries of this network are loose and constantly changing. Since the time of my data collection, newly popular influencers have begun to collaborate with others in the network, and some of those I tracked in April have since deleted their channels or removed their content. The data also does not represent the full extent of networking and collaboration that occurs between influencers. Many of them, for example, comment on each other’s videos; they reference each other’s ideas in their content; and they interact on platforms like Twitter and Instagram in addition to YouTube. In other words, the data I collected is illustrative, not comprehensive.

## Charles (45)

Charles (45) describes the following process for identifying and labeling channels:

The first step was to identify a network of channels containing white supremacist content on YouTube, and then to analyze a representative sample of the themes, rhetoric, messaging, presentation in the videos uploaded to those channels. In the first stage, I gathered channels via user interface snowball sampling, using the ‘related channel’ feature on each channel—as well as any cross-channel appearances by content creators. Channels were tagged and categorized, then ranked by subscriber count within those categories.

...

The first stage of this study used a modified style of snowball sampling, called user interface snowball sampling (UISS), to build a repository of YouTube channels for stage two's analysis . . . Rather than using recommendations from gatekeepers, this study uses the 'related channels' bar to find similar channels, as well as channels whose content creators appear in the videos of that channel. As more channels were found, I stopped periodically to analyze each channel for white supremacist themes (see Table 1). In order to be considered for analysis, the channel had to include at least one of the themes from Table 1.

The initial categorization was performed using six sampled videos: the two most viewed, the two most recently uploaded, and two randomly selected from the hundred most recent uploads (using a random number generator). This approach aimed to represent the nature of the content on that channel, determining whether it contains any of the white supremacist themes described in the literature. Channel samples that did not contain any of these themes were excluded from analysis and their related channels were not snowballed. The process was repeated until the point of data saturation (Schensul & LeCompte, 2010). This was apparent by generation four when already-sampled channels began to dominate the related channels sections and when the few, new channels were so low in subscribers that they would not make the final cut in stage two.

...

[T]he study started with avowed white nationalist Richard Spencer's YouTube channel, AltRight.com and proceeded from there, using YouTube's related channel feature and cross-channel appearances to approximate the size and composition of white supremacist communities on YouTube.

Charles used the following themes to identify channels (drawn from Table 1 in (45): Neo-Nazi, Nationalism, Genocide, Christian Identity/Racist Asatru, Opposition to Interracial Marriage, White Pro-nationalism, Islamophobia, Anti-Feminism, Non-white Criminality, Anti-Immigrant, White Supremacy, Anti-Semitism, Conspiracies, Apocalypticism.

### **Aaron Sankin (46)**

Journalist Aaron Sankin (46) describes the following process for curating and validating a list of extremist channels:

[W]e used lists of organizations promoting hate from the Southern Poverty Law Center, Hope Not Hate, the Canadian Anti-Hate Network, and the Counter Extremism Project, in addition to channels recommended on the white supremacist forum Stormfront, to create a compendium of 226 extremist YouTube channels earlier this year.

While less than scientific (and suffering from a definite selection bias), this list of channels provided a hazy window to watch what YouTube's promises to counteract hate looked like in practice. And since June 5th, just 31 channels from our list of more than 200 have been terminated for hate speech. (Eight others were either banned before this date or went offline for unspecified reasons.)

Before publishing this story, we shared our list with Google, which told us almost 60 percent of the channels on it have had at least one video removed, with more than

3,000 individual videos removed from them in total. The company also emphasized it was still ramping up enforcement. These numbers, however, suggest YouTube is aware of many of the hate speech issues concerning the remaining 187 channels—and has allowed them to stay active.

## **Ethics and consent language**

### **Survey informed consent**

This research project is being conducted by Andrew Guess from Princeton University, Brendan Nyhan from Dartmouth College, and Christo Wilson from Northeastern University. It is a study to learn more about public opinion on issues in the news. Your participation is voluntary. Participation involves completion of a short survey as well as the option to participate in additional components of the study that would collect confidential data on your online behavior. This would entail confidential tracking data of your online website visits which you have already agreed to as part of your YouGov Pulse participation, and could include up to 1 year of data already collected prior to this survey. You may choose to not answer any or all questions and to not participate in any portion of the study that you choose. The researchers will not store information that could identify you with your survey responses. Identifying information will not be used in any presentation or publication written about this project. You must be age 18 or older to participate. Questions about this project may be directed to Brendan Nyhan, Professor of Government, at [Brendan.J.Nyhan@dartmouth.edu](mailto:Brendan.J.Nyhan@dartmouth.edu).

If you agree to participate in this survey, click “I agree” below.

-I agree to participate

-I do not agree to participate

### **Browser extension informed consent (invitation)**

This extension implements a user study being conducted by researchers at Northeastern University, Dartmouth, Princeton, and University of Exeter. If you choose to participate, this browser extension will confidentially collect four types of data from your browser.

1. Metadata for web browsing (e.g. URL visited with time of visit), exposure to embedded URLs on websites (e.g. YouTube videos), and interactions with websites (e.g. clicks and video viewing time). This data is collected until the study is completed.
2. Copies of the HTML seen on specific sites: Google Search, Google News, YouTube, Facebook Newsfeed, and Twitter Feed. We remove all identifying information before it leaves the browser. This confidential data is collected until the study is completed.
3. Browsing history, Google and YouTube account histories (e.g. searches, comments, clicks), and online advertising preferences (Google, Bluekai, Facebook). This data is initially collected for the year prior to the installation of our browser extension, and we then check these sources once every two weeks to collect updates until the study is completed.
4. Snapshots of selected URLs from your browser. For each URL, the extension saves a copy of the HTML that renders, effectively capturing what you would have seen had you visited that website yourself. Once per week we conduct searches on Google Search, Google News, Youtube, and Twitter, and collect the current frontpage of Google News, YouTube, and Twitter. These web page visits will occur in the background and will not affect the normal functioning of your browser.

Additionally, if you choose to participate, you will be asked to take a survey in which we ask you several questions about your demographics, web usage, and media preferences. These data, as well as those mentioned above, will be used to analyze the correlations between your online behavior and your interest profiles.

After the study is complete on December 31, 2020, the extension will uninstall itself. All data collected will be kept strictly confidential and used for research purposes only. We will not share your responses with anyone who is not involved in this research.

Minimizing risks: None of the raw data collected through our browser extension during this study will be publicly released, and the survey data will not be given or sold to a third party without the panelist's consent. All raw data will be stored on a secure server at Northeastern University, and access to that server will be limited to members of the research group. Only aggregated data will be released, which minimizes the possibility of reidentification. All data that is collected from our survey and from participants' browsers will be stripped of personally identifiable information to the best of our ability.

The decision to participate in this research project is voluntary. You do not have to participate, and there is no penalty if you choose not to participate in this research or if you choose to stop participating. You may choose to stop participating at any time, and you may request that we delete all data collected from your browser.

## **Browser extension informed consent (installation page)**

Welcome to the study!

This extension implements a user study being conducted by researchers at Northeastern University, Dartmouth, Princeton, and the University of Exeter. If you choose to participate, this browser extension will confidentially collect four types of data from your browser.

1. Metadata for web browsing (e.g. URL visited with time of visit), exposure to embedded URLs on websites (e.g. YouTube videos), and interactions with websites (e.g. clicks and video viewing time). This data is collected until the study is completed.
2. Copies of the HTML seen on specific sites: Google Search, Google News, YouTube, Facebook Newsfeed, and Twitter Feed. We remove all identifying information before it leaves the browser. This confidential data is collected until the study is completed.
3. Browsing history, Google and YouTube account histories (e.g. searches, comments, clicks), and online advertising preferences (Google, Bluekai, Facebook). This data is initially collected for the year prior to the installation of our browser extension, and we then check these sources once every two weeks to collect updates until the study is completed.
4. Snapshots of selected URLs from your browser. For each URL, the extension saves a copy of the HTML that renders, effectively capturing what you would have seen had you visited that website yourself. Once per week we conduct searches on Google Search, Google News, YouTube, and Twitter, and collect the current frontpage of Google News, YouTube, and Twitter. These web page visits will occur in the background and will not affect the normal functioning of

your browser. There is a theoretical risk of “profile pollution” – that this extension will impact your online profiles, i.e., “pollute” them with actions that you did not take. To mitigate this risk, the extension will only visit content that is benign and will only execute searches for general terms. Our previous work has found that historical information of this kind has minimal impact on online services.

Additionally, if you choose to participate, you will be asked to take a survey in which we ask you several questions about your demographics, web usage, and media preferences. These data, as well as those mentioned above, will be used to analyze the correlations between your online behavior and your interest profiles.

After the study is complete on December 31, 2020, the extension will uninstall itself. All data collected will be kept strictly confidential and used for research purposes only. We will not share your responses with anyone who is not involved in this research.

You must be at least 18 years old to take part in this study. The decision to participate in this research project is voluntary. You do not have to participate and you can refuse to participate. Even if you begin our experiment, you can stop at any time. You may request that we delete all data collected from your web browser at any time.

We have minimized the risks. We are collecting basic demographic information, information about your internet habits, and copies of web pages that you visit. To the greatest extent possible, information that identifies you will be removed from all collected web data.

Your role in this study is confidential. However, because of the nature of electronic systems, it is possible, though unlikely, that respondents could be identified by some electronic record associated with the response. Neither the researchers nor anyone involved with this study will be collecting those data. Any reports or publications based on this research will use only aggregate data and will not identify you or any individual as being affiliated with this project.

**Survey codebook**

=====  
Project Code: ██████████  
Project Name: ██████████████████████████████████████  
Prepared for: ████████████████████  
Interviews: 4000  
Field Period: July 21, 2020 – September 22, 2020  
Project Manager: Sam Luks – 650.462.8009  
=====

=====  
Variable List  
=====

|                            |                                                                                      |
|----------------------------|--------------------------------------------------------------------------------------|
| caseid                     | Case ID                                                                              |
| weight                     | Weight                                                                               |
| samplegroup                | Sample group                                                                         |
| consent                    | consent                                                                              |
| q1                         | Ideology                                                                             |
| yt_freq                    | How frequently you use YouTube                                                       |
| pid3                       | 3 point party ID                                                                     |
| pid7                       | 7 point Party ID                                                                     |
| q2                         | Interested in politics                                                               |
| q3                         | Trump job approval                                                                   |
| feeling_DemParty           | Feeling thermometer -- Democratic Party                                              |
| feeling_DemParty_dk_flag   | feeling_DemParty - don't know flag                                                   |
| feeling_Trump              | Feeling thermometer -- Donald Trump                                                  |
| feeling_Trump_dk_flag      | feeling_Trump - don't know flag                                                      |
| feeling_Biden              | Feeling thermometer -- Joe Biden                                                     |
| feeling_Biden_dk_flag      | feeling_Biden - don't know flag                                                      |
| feeling_NewsMedia          | Feeling thermometer -- The news media                                                |
| feeling_NewsMedia_dk_flag  | feeling_NewsMedia - don't know flag                                                  |
| feeling_Jews               | Feeling thermometer -- Jews                                                          |
| feeling_Jews_dk_flag       | feeling_Jews - don't know flag                                                       |
| feeling_Israel             | Feeling thermometer -- Israel                                                        |
| feeling_Israel_dk_flag     | feeling_Israel - don't know flag                                                     |
| feeling_Muslims            | Feeling thermometer -- Muslims                                                       |
| feeling_Muslims_dk_flag    | feeling_Muslims - don't know flag                                                    |
| feeling_Norway             | Feeling thermometer -- Norway                                                        |
| feeling_Norway_dk_flag     | feeling_Norway - don't know flag                                                     |
| feeling_LGBT               | Feeling thermometer -- People who identify as lesbian, gay, bisexual, or transgender |
| feeling_LGBT_dk_flag       | feeling_LGBT - don't know flag                                                       |
| feeling_Christians         | Feeling thermometer -- Christians                                                    |
| feeling_Christians_dk_flag | feeling_Christians - don't know flag                                                 |
| feeling_Blacks             | Feeling thermometer -- Blacks                                                        |
| feeling_Blacks_dk_flag     | feeling_Blacks - don't know flag                                                     |
| feeling_White              | Feeling thermometer -- Whites                                                        |
| feeling_White_dk_flag      | feeling_White - don't know flag                                                      |
| feeling_Hispanics          | Feeling thermometer -- Hispanics                                                     |
| feeling_Hispanics_dk_flag  | feeling_Hispanics - don't know flag                                                  |
| feeling_Asians             | Feeling thermometer -- Asians                                                        |
| feeling_Asians_dk_flag     | feeling_Asians - don't know flag                                                     |



|                           |                                                                                                                                                                                                             |
|---------------------------|-------------------------------------------------------------------------------------------------------------------------------------------------------------------------------------------------------------|
| feeling_Feminists         | Feeling thermometer -- Feminists                                                                                                                                                                            |
| feeling_Feminists_dk_flag | feeling_Feminists - don't know flag                                                                                                                                                                         |
| q4_1                      | Whether agree with the statement (racial resentment) -- Irish, Italians, Jewish and many other minorities overcame prejudice and worked their way up. Blacks should do the same without any special favors. |
| q4_2                      | Whether agree with the statement (racial resentment) -- Generations of slavery and discrimination have created conditions that make it difficult for blacks to work their way out of the lower class.       |
| q4_3                      | Whether agree with the statement (racial resentment) -- Over the past few years, blacks have gotten less than they deserve.                                                                                 |
| q4_4                      | Whether agree with the statement (racial resentment) -- It's really a matter of some people not trying hard enough, if blacks would only try harder they could be just as well off as whites.               |
| q4_5                      | Whether agree with the statement (racial resentment) -- White people in the U.S. have certain advantages because of the color of their skin.                                                                |
| q4_6                      | Whether agree with the statement (racial resentment) -- Racial problems in the U.S. are rare, isolated situations.                                                                                          |
| q4_7                      | Whether agree with the statement (feminists) -- When women lose to men in a fair competition, they typically complain about being discriminated against.                                                    |
| q4_8                      | Whether agree with the statement (feminists) -- Feminists are making entirely reasonable demands of men.                                                                                                    |
| q5                        | How often play video games                                                                                                                                                                                  |
| social_isolation_1        | How often the statement is descriptive -- How often do you feel that you lack companionship?                                                                                                                |
| social_isolation_2        | How often the statement is descriptive -- How often do you feel left out?                                                                                                                                   |
| social_isolation_3        | How often the statement is descriptive -- How often do you feel isolated from others?                                                                                                                       |
| q6_2                      | Whether the statement is True -- Given enough provocation, I may hit a person                                                                                                                               |
| q6_4                      | Whether the statement is True -- I often find myself disagreeing with people                                                                                                                                |
| q6_5                      | Whether the statement is True -- I can't help getting into arguments when people disagree with me                                                                                                           |
| q6_7                      | Whether the statement is True -- I have trouble controlling my temper                                                                                                                                       |
| q6_9                      | Whether the statement is True -- I flare up                                                                                                                                                                 |

quickly but get over it quickly

q6\_10 Whether the statement is True -- At times I feel I have gotten a raw deal out of life

q6\_1 Whether the statement is True -- There are people who have pushed me so far that we have come to blows

q6\_3 Whether the statement is True -- I have threatened people I know

q6\_6 Whether the statement is True -- My friends say I'm somewhat argumentative

q6\_8 Whether the statement is True -- Sometimes I fly off the handle for no good reason

q6\_11 Whether the statement is True -- Other people always seem to get the breaks

q6\_12 Whether the statement is True -- I wonder why sometimes I feel so bitter about things

q7\_1 Whether agree with the statement (conspiracy predispositions) -- Much of our lives are being controlled by plots hatched in secret places.

q7\_2 Whether agree with the statement (conspiracy predispositions) -- Even though we live in a democracy, a few people will always run things anyway.

q7\_3 Whether agree with the statement (conspiracy predispositions) -- The people who really "run" the country are not known to the voter.

q7\_4 Whether agree with the statement (conspiracy predispositions) -- Big events like wars, recessions, and the outcomes of elections are controlled by small groups of people who are working in secret against the rest of us.

q8 How much trust you have in the mass media

q9 How accurate is the news posted online

q10a\_1 Fox News

q10a\_2 The New York Times

q10a\_3 CNN

q10a\_4 The Washington Post

q10a\_5 MSNBC

q10a\_6 Breitbart

q10a\_7 InfoWars

q11\_1 How much you trust you have in this news source -- Fox News

q11\_2 How much you trust you have in this news source -- The New York Times

q11\_3 How much you trust you have in this news source -- CNN

q11\_4 How much you trust you have in this news source -- The Washington Post

q11\_5 How much you trust you have in this news source -- MSNBC

q11\_6 How much you trust you have in this news source

-- Breitbart

q11\_7 How much you trust you have in this news source

-- InfoWars

q12\_1 How much trust you have in information from the following source -- Organizations you follow on YouTube or social media platforms (Twitter, Facebook, Instagram, Snapchat, etc.)

q12\_2 How much trust you have in information from the following source -- Celebrities you follow on YouTube or social media platforms (Twitter, Facebook, Instagram, Snapchat, etc.)

q12\_3 How much trust you have in information from the following source -- People you follow but do not personally know on YouTube or social media platforms (Twitter, Facebook, Instagram, Snapchat, etc.)

q12\_4 How much trust you have in information from the following source -- People you follow and personally know on YouTube or social media platforms (Twitter, Facebook, Instagram, Snapchat, etc.)

q12\_5 How much trust you have in information from the following source -- People you personally know and talk to offline

q12\_6 How much trust you have in information from the following source -- The mass media (such as newspapers, TV and radio)

q13 How frequently you use Google

q14 How much of the information you find using google is accurate

q15 Google personalizes the search results

q17 How much of the information you find using YouTube is accurate

q18 YouTube personalizes the videos

q28 How satisfied you are with the search result quality on Google

q29 How much trust you have in information on Google

q30 What Google search results favor - Liberals or conservatives

q31 How satisfied you are with the video quality on YouTube

q32 How much trust you have in YouTube videos

q33 What YouTube videos favor - Liberals or conservatives

q34\_1 How concerned you feel about the following -- Getting coronavirus yourself

q34\_2 How concerned you feel about the following -- Family members getting coronavirus

q35 How much of a threat is the coronavirus for US people

q36\_2 Believe the following or not -- Avoiding larger

gatherings of people can help prevent the spread of the coronavirus

q36\_3 Believe the following or not -- Masks are an effective way to prevent the spread of the coronavirus

q36\_4 Believe the following or not -- Coronavirus can be spread by people who do not show symptoms

q36\_6 Believe the following or not -- The medication hydroxychloroquine is proven to cure or prevent COVID-19, the illness caused by the novel coronavirus

q36\_8 Believe the following or not -- The Chinese government created the coronavirus that causes COVID-19 as a bioweapon

q36\_10 Believe the following or not -- A group funded by Bill Gates patented the coronavirus that causes COVID-19

q36\_1 Believe the following or not -- Frequent handwashing is a way to protect against the coronavirus

q36\_5 Believe the following or not -- A new loss of taste or smell is a symptom of the coronavirus

q36\_7 Believe the following or not -- The coronavirus is being spread by 5G cell phone technology

q36\_9 Believe the following or not -- The media is exaggerating the threat from the coronavirus to damage President Trump

q37\_1 Agree with the following or not -- Getting vaccines is a good way to protect children from disease

q37\_2 Agree with the following or not -- Generally I do what my doctor recommends about vaccines

q37\_3 Agree with the following or not -- New vaccines are recommended only if they are safe

q37\_4 Agree with the following or not -- Children do not need vaccines for diseases that are not common anymore

q37\_5 Agree with the following or not -- I am concerned about serious side effects of vaccines

q37\_6 Agree with the following or not -- Some vaccines cause autism in healthy children

q37\_7 Agree with the following or not -- Vaccinations are one of the most significant achievements in improving public health

q38 How often you don't take surveys seriously

q39 Did you make an effort to look up information

platform\_1 Desktop or laptop computer

platform\_2 Tablet

platform\_3 Smartphone

browsers\_1 Chrome

browsers\_2 Firefox

|                   |                                      |
|-------------------|--------------------------------------|
| browsers_3        | Safari                               |
| browsers_4        | Microsoft Edge                       |
| browsers_5        | Internet Explorer                    |
| browsers_6        | None of the above                    |
| browser_top       | browser_top                          |
| elig_extension    | elig_extension                       |
| extension_install | Agree to install extension           |
| birthyr           | Birth Year                           |
| gender            | Gender                               |
| race              | Race                                 |
| educ              | Education                            |
| marstat           | Marital Status                       |
| employ            | Employment Status                    |
| faminc_new        | Family income                        |
| presvote16post    | 2016 President Vote Post Election    |
| inputstate        | State of Residence                   |
| votereg           | Voter Registration Status            |
| ideo5             | Ideology (1)                         |
| newsint           | Political Interest                   |
| religpew          | Religion                             |
| pew_churatd       | Church attendance (Pew version)      |
| pew_bornagain     | Born Again (Pew version)             |
| pew_religimp      | Importance of religion (Pew version) |
| pew_prayer        | Frequency of Prayer (Pew version)    |
| starttime         | Questionnaire Start Time             |
| endtime           | Questionnaire End Time               |

Verbatims

```

=====
session_visa      ID to link to extension installation
pid3_t           3 point party ID - other
q30_open         What Google search results favor - Other
q33_open         What YouTube videos favor - Other
q40              Comments on the survey
whynot           Reason for not installing extension

```

Variable map and codebook

```

=====
Name:            caseid
Description:     Case ID

Numeric Variable - no categories

answered        : 4000

```

```

=====
Name:            weight
Description:     Weight

Numeric Variable - no categories

answered        : 4000

```

```
=====
Name:      samplegroup
Description: Sample group
```

| Count | Code  | Label                                           |
|-------|-------|-------------------------------------------------|
| ----- | ----- | -----                                           |
| 2000  | 1     | CCES 2018 recontact                             |
| 1000  | 2     | CCES 2018 with high racial resentment recontact |
| 1000  | 3     | High YouTube users                              |

```
=====
Name:      consent
Description: consent
```

| Count | Code  | Label                         |
|-------|-------|-------------------------------|
| ----- | ----- | -----                         |
| 4000  | 1     | I agree to participate        |
| 0     | 2     | I do not agree to participate |

```
=====
Name:      q1
Description: Ideology
```

| Count | Code  | Label                        |
|-------|-------|------------------------------|
| ----- | ----- | -----                        |
| 638   | 1     | Very liberal                 |
| 528   | 2     | Somewhat liberal             |
| 224   | 3     | Slightly liberal             |
| 909   | 4     | Moderate; middle of the road |
| 243   | 5     | Slightly conservative        |
| 551   | 6     | Somewhat conservative        |
| 905   | 7     | Very conservative            |
| 2     | 98    | skipped                      |

```
=====
Name:      yt_freq
Description: How frequently you use YouTube
```

| Count | Code  | Label                        |
|-------|-------|------------------------------|
| ----- | ----- | -----                        |
| 440   | 1     | Almost constantly            |
| 1300  | 2     | Several times a day          |
| 417   | 3     | About once a day             |
| 614   | 4     | A few times a week           |
| 235   | 5     | About once a week            |
| 368   | 6     | A few times a month          |
| 89    | 7     | Once a month                 |
| 345   | 8     | Less often than once a month |
| 192   | 9     | Never                        |

```
=====
```

Name: pid3  
Description: 3 point party ID

| Count | Code | Label       |
|-------|------|-------------|
| 1307  | 1    | Democrat    |
| 1235  | 2    | Republican  |
| 1170  | 3    | Independent |
| 222   | 4    | Other       |
| 66    | 5    | Not sure    |

Name: pid7  
Description: 7 point Party ID

| Count | Code | Label                      |
|-------|------|----------------------------|
| 932   | 1    | Strong Democrat            |
| 375   | 2    | Not very strong Democrat   |
| 355   | 3    | Lean Democrat              |
| 572   | 4    | Independent                |
| 483   | 5    | Lean Republican            |
| 327   | 6    | Not very strong Republican |
| 908   | 7    | Strong Republican          |
| 48    | 8    | Not sure                   |
| 0     | 9    | Don't know                 |

Name: q2  
Description: Interested in politics

| Count | Code | Label                 |
|-------|------|-----------------------|
| 1704  | 1    | Extremely interested  |
| 1164  | 2    | Very interested       |
| 711   | 3    | Somewhat interested   |
| 276   | 4    | Not very interested   |
| 145   | 5    | Not at all interested |

Name: q3  
Description: Trump job approval

| Count | Code | Label               |
|-------|------|---------------------|
| 1458  | 1    | Strongly approve    |
| 540   | 2    | Somewhat approve    |
| 255   | 3    | Somewhat disapprove |
| 1746  | 4    | Strongly disapprove |
| 1     | 8    | skipped             |

=====  
Name: feeling\_DemParty  
Description: Feeling thermometer -- Democratic Party

Numeric Variable - no categories

answered : 4000  
don't know : 55

=====  
Name: feeling\_DemParty\_dk\_flag  
Description: feeling\_DemParty - don't know flag

Numeric Variable - no categories

answered : 4000

=====  
Name: feeling\_Trump  
Description: Feeling thermometer -- Donald Trump

Numeric Variable - no categories

answered : 4000  
don't know : 34

=====  
Name: feeling\_Trump\_dk\_flag  
Description: feeling\_Trump - don't know flag

Numeric Variable - no categories

answered : 4000

=====  
Name: feeling\_Biden  
Description: Feeling thermometer -- Joe Biden

Numeric Variable - no categories

answered : 4000  
don't know : 63

=====  
Name: feeling\_Biden\_dk\_flag  
Description: feeling\_Biden - don't know flag

Numeric Variable - no categories

answered : 4000

=====  
Name: feeling\_NewsMedia  
Description: Feeling thermometer -- The news media

Numeric Variable - no categories



answered : 4000  
don't know : 55

=====  
Name: feeling\_NewsMedia\_dk\_flag  
Description: feeling\_NewsMedia - don't know flag

Numeric Variable - no categories

answered : 4000

=====  
Name: feeling\_Jews  
Description: Feeling thermometer -- Jews

Numeric Variable - no categories

answered : 4000  
don't know : 167

=====  
Name: feeling\_Jews\_dk\_flag  
Description: feeling\_Jews - don't know flag

Numeric Variable - no categories

answered : 4000

=====  
Name: feeling\_Israel  
Description: Feeling thermometer -- Israel

Numeric Variable - no categories

answered : 4000  
don't know : 268

=====  
Name: feeling\_Israel\_dk\_flag  
Description: feeling\_Israel - don't know flag

Numeric Variable - no categories

answered : 4000

=====  
Name: feeling\_Muslims  
Description: Feeling thermometer -- Muslims

Numeric Variable - no categories

answered : 4000  
don't know : 163

=====  
Name: feeling\_Muslims\_dk\_flag  
Description: feeling\_Muslims - don't know flag

Numeric Variable - no categories

answered : 4000

---

Name: feeling\_Norway  
Description: Feeling thermometer -- Norway

Numeric Variable - no categories

answered : 5  
not asked : 3995

---

Name: feeling\_Norway\_dk\_flag  
Description: feeling\_Norway - don't know flag

Numeric Variable - no categories

answered : 4000

---

Name: feeling\_LGBT  
Description: Feeling thermometer -- People who identify as lesbian, gay, bisexual, or transgender

Numeric Variable - no categories

answered : 5  
not asked : 3995

---

Name: feeling\_LGBT\_dk\_flag  
Description: feeling\_LGBT - don't know flag

Numeric Variable - no categories

answered : 4000

---

Name: feeling\_Christians  
Description: Feeling thermometer -- Christians

Numeric Variable - no categories

answered : 4000  
don't know : 85

---

Name: feeling\_Christians\_dk\_flag  
Description: feeling\_Christians - don't know flag

Numeric Variable - no categories

answered : 4000

---

Name: feeling\_Blacks

Description: Feeling thermometer -- Blacks  
Numeric Variable - no categories  
answered : 4000  
don't know : 92

=====  
Name: feeling\_Blacks\_dk\_flag  
Description: feeling\_Blacks - don't know flag  
Numeric Variable - no categories  
answered : 4000

=====  
Name: feeling\_White  
Description: Feeling thermometer -- Whites  
Numeric Variable - no categories  
answered : 4000  
don't know : 76

=====  
Name: feeling\_White\_dk\_flag  
Description: feeling\_White - don't know flag  
Numeric Variable - no categories  
answered : 4000

=====  
Name: feeling\_Hispanics  
Description: Feeling thermometer -- Hispanics  
Numeric Variable - no categories  
answered : 5  
not asked : 3995

=====  
Name: feeling\_Hispanics\_dk\_flag  
Description: feeling\_Hispanics - don't know flag  
Numeric Variable - no categories  
answered : 4000

=====  
Name: feeling\_Asians  
Description: Feeling thermometer -- Asians  
Numeric Variable - no categories  
answered : 5  
not asked : 3995

```
=====
Name:      feeling_Asians_dk_flag
Description: feeling_Asians - don't know flag

           Numeric Variable - no categories

           answered      : 4000
=====
```

```
=====
Name:      feeling_Feminists
Description: Feeling thermometer -- Feminists

           Numeric Variable - no categories

           answered      : 4000
           don't know    : 131
=====
```

```
=====
Name:      feeling_Feminists_dk_flag
Description: feeling_Feminists - don't know flag

           Numeric Variable - no categories

           answered      : 4000
=====
```

```
=====
Name:      q4_1
Description: Whether agree with the statement (racial resentment) -- Irish,
           Italians, Jewish and many other minorities overcame prejudice
           and worked their way up. Blacks should do the same without any
           special favors.
=====
```

| Count | Code | Label                      |
|-------|------|----------------------------|
| ----- | ---- | -----                      |
| 1518  | 1    | Strongly agree             |
| 630   | 2    | Somewhat agree             |
| 566   | 3    | Neither agree nor disagree |
| 484   | 4    | Somewhat disagree          |
| 802   | 5    | Strongly disagree          |

```
=====
Name:      q4_2
Description: Whether agree with the statement (racial resentment) --
           Generations of slavery and discrimination have created
           conditions that make it difficult for blacks to work their way
           out of the lower class.
=====
```

| Count | Code | Label                      |
|-------|------|----------------------------|
| ----- | ---- | -----                      |
| 1101  | 1    | Strongly agree             |
| 601   | 2    | Somewhat agree             |
| 358   | 3    | Neither agree nor disagree |
| 422   | 4    | Somewhat disagree          |
| 1518  | 5    | Strongly disagree          |

=====  
Name: q4\_3  
Description: Whether agree with the statement (racial resentment) -- Over the past few years, blacks have gotten less than they deserve.

| Count | Code  | Label                      |
|-------|-------|----------------------------|
| ----- | ----- | -----                      |
| 922   | 1     | Strongly agree             |
| 612   | 2     | Somewhat agree             |
| 611   | 3     | Neither agree nor disagree |
| 477   | 4     | Somewhat disagree          |
| 1378  | 5     | Strongly disagree          |

=====  
Name: q4\_4  
Description: Whether agree with the statement (racial resentment) -- It's really a matter of some people not trying hard enough, if blacks would only try harder they could be just as well off as whites.

| Count | Code  | Label                      |
|-------|-------|----------------------------|
| ----- | ----- | -----                      |
| 1039  | 1     | Strongly agree             |
| 718   | 2     | Somewhat agree             |
| 645   | 3     | Neither agree nor disagree |
| 500   | 4     | Somewhat disagree          |
| 1098  | 5     | Strongly disagree          |

=====  
Name: q4\_5  
Description: Whether agree with the statement (racial resentment) -- White people in the U.S. have certain advantages because of the color of their skin.

| Count | Code  | Label                      |
|-------|-------|----------------------------|
| ----- | ----- | -----                      |
| 1337  | 1     | Strongly agree             |
| 622   | 2     | Somewhat agree             |
| 478   | 3     | Neither agree nor disagree |
| 412   | 4     | Somewhat disagree          |
| 1151  | 5     | Strongly disagree          |

=====  
Name: q4\_6  
Description: Whether agree with the statement (racial resentment) -- Racial problems in the U.S. are rare, isolated situations.

| Count | Code  | Label          |
|-------|-------|----------------|
| ----- | ----- | -----          |
| 635   | 1     | Strongly agree |
| 657   | 2     | Somewhat agree |

|      |   |                            |
|------|---|----------------------------|
| 579  | 3 | Neither agree nor disagree |
| 682  | 4 | Somewhat disagree          |
| 1447 | 5 | Strongly disagree          |

=====  
Name: q4\_7  
Description: Whether agree with the statement (feminists) -- When women lose to men in a fair competition, they typically complain about being discriminated against.

| Count | Code  | Label                      |
|-------|-------|----------------------------|
| ----- | ----- | -----                      |
| 802   | 1     | Strongly agree             |
| 882   | 2     | Somewhat agree             |
| 961   | 3     | Neither agree nor disagree |
| 664   | 4     | Somewhat disagree          |
| 691   | 5     | Strongly disagree          |

=====  
Name: q4\_8  
Description: Whether agree with the statement (feminists) -- Feminists are making entirely reasonable demands of men.

| Count | Code  | Label                      |
|-------|-------|----------------------------|
| ----- | ----- | -----                      |
| 867   | 1     | Strongly agree             |
| 674   | 2     | Somewhat agree             |
| 802   | 3     | Neither agree nor disagree |
| 567   | 4     | Somewhat disagree          |
| 1090  | 5     | Strongly disagree          |

=====  
Name: q5  
Description: How often play video games

| Count | Code  | Label                |
|-------|-------|----------------------|
| ----- | ----- | -----                |
| 844   | 1     | Often                |
| 947   | 2     | Sometimes            |
| 695   | 3     | Hardly ever          |
| 1502  | 4     | Never                |
| 12    | 5     | Prefer not to answer |

=====  
Name: social\_isolation\_1  
Description: How often the statement is descriptive -- How often do you feel that you lack companionship?

| Count | Code  | Label |
|-------|-------|-------|
| ----- | ----- | ----- |
| 1315  | 1     | Never |

|      |   |           |
|------|---|-----------|
| 1181 | 2 | Rarely    |
| 1010 | 3 | Sometimes |
| 492  | 4 | Often     |
| 2    | 8 | skipped   |

=====  
Name: social\_isolation\_2  
Description: How often the statement is descriptive -- How often do you feel left out?

| Count | Code  | Label     |
|-------|-------|-----------|
| ----- | ----- | -----     |
| 1035  | 1     | Never     |
| 1453  | 2     | Rarely    |
| 1082  | 3     | Sometimes |
| 428   | 4     | Often     |
| 2     | 8     | skipped   |

=====  
Name: social\_isolation\_3  
Description: How often the statement is descriptive -- How often do you feel isolated from others?

| Count | Code  | Label     |
|-------|-------|-----------|
| ----- | ----- | -----     |
| 1139  | 1     | Never     |
| 1272  | 2     | Rarely    |
| 1070  | 3     | Sometimes |
| 517   | 4     | Often     |
| 2     | 8     | skipped   |

=====  
Name: q6\_2  
Description: Whether the statement is True -- Given enough provocation, I may hit a person

| Count | Code  | Label                   |
|-------|-------|-------------------------|
| ----- | ----- | -----                   |
| 226   | 1     | Completely true for me  |
| 242   | 2     | Mostly true for me      |
| 578   | 3     | Slightly true for me    |
| 379   | 4     | Slightly false for me   |
| 827   | 5     | Mostly false for me     |
| 1748  | 6     | Completely false for me |

=====  
Name: q6\_4  
Description: Whether the statement is True -- I often find myself disagreeing with people

| Count | Code | Label |
|-------|------|-------|
|-------|------|-------|

| Count | Code | Label                   |
|-------|------|-------------------------|
| 187   | 1    | Completely true for me  |
| 444   | 2    | Mostly true for me      |
| 1376  | 3    | Slightly true for me    |
| 879   | 4    | Slightly false for me   |
| 761   | 5    | Mostly false for me     |
| 352   | 6    | Completely false for me |
| 1     | 8    | skipped                 |

=====  
Name: q6\_5  
Description: Whether the statement is True -- I can't help getting into arguments when people disagree with me

| Count | Code | Label                   |
|-------|------|-------------------------|
| 81    | 1    | Completely true for me  |
| 225   | 2    | Mostly true for me      |
| 698   | 3    | Slightly true for me    |
| 785   | 4    | Slightly false for me   |
| 1220  | 5    | Mostly false for me     |
| 990   | 6    | Completely false for me |
| 1     | 8    | skipped                 |

=====  
Name: q6\_7  
Description: Whether the statement is True -- I have trouble controlling my temper

| Count | Code | Label                   |
|-------|------|-------------------------|
| 71    | 1    | Completely true for me  |
| 158   | 2    | Mostly true for me      |
| 625   | 3    | Slightly true for me    |
| 520   | 4    | Slightly false for me   |
| 1237  | 5    | Mostly false for me     |
| 1388  | 6    | Completely false for me |
| 1     | 8    | skipped                 |

=====  
Name: q6\_9  
Description: Whether the statement is True -- I flare up quickly but get over it quickly

| Count | Code | Label                  |
|-------|------|------------------------|
| 190   | 1    | Completely true for me |
| 529   | 2    | Mostly true for me     |
| 1042  | 3    | Slightly true for me   |
| 615   | 4    | Slightly false for me  |
| 867   | 5    | Mostly false for me    |



756 6 Completely false for me  
1 8 skipped

=====  
Name: q6\_10  
Description: Whether the statement is True -- At times I feel I have gotten a raw deal out of life

| Count | Code  | Label                   |
|-------|-------|-------------------------|
| ----- | ----- | -----                   |
| 296   | 1     | Completely true for me  |
| 357   | 2     | Mostly true for me      |
| 939   | 3     | Slightly true for me    |
| 530   | 4     | Slightly false for me   |
| 861   | 5     | Mostly false for me     |
| 1017  | 6     | Completely false for me |

=====  
Name: q6\_1  
Description: Whether the statement is True -- There are people who have pushed me so far that we have come to blows

| Count | Code  | Label                   |
|-------|-------|-------------------------|
| ----- | ----- | -----                   |
| 0     | 1     | Completely true for me  |
| 0     | 2     | Mostly true for me      |
| 1     | 3     | Slightly true for me    |
| 0     | 4     | Slightly false for me   |
| 1     | 5     | Mostly false for me     |
| 3     | 6     | Completely false for me |
| 3995  | 9     | not asked               |

=====  
Name: q6\_3  
Description: Whether the statement is True -- I have threatened people I know

| Count | Code  | Label                   |
|-------|-------|-------------------------|
| ----- | ----- | -----                   |
| 0     | 1     | Completely true for me  |
| 0     | 2     | Mostly true for me      |
| 1     | 3     | Slightly true for me    |
| 0     | 4     | Slightly false for me   |
| 1     | 5     | Mostly false for me     |
| 3     | 6     | Completely false for me |
| 3995  | 9     | not asked               |

=====  
Name: q6\_6  
Description: Whether the statement is True -- My friends say I'm somewhat argumentative

| Count | Code  | Label                   |
|-------|-------|-------------------------|
| ----- | ----- | -----                   |
| 0     | 1     | Completely true for me  |
| 0     | 2     | Mostly true for me      |
| 0     | 3     | Slightly true for me    |
| 0     | 4     | Slightly false for me   |
| 3     | 5     | Mostly false for me     |
| 2     | 6     | Completely false for me |
| 3995  | 9     | not asked               |

=====  
Name: q6\_8  
Description: Whether the statement is True -- Sometimes I fly off the handle for no good reason

| Count | Code  | Label                   |
|-------|-------|-------------------------|
| ----- | ----- | -----                   |
| 0     | 1     | Completely true for me  |
| 0     | 2     | Mostly true for me      |
| 0     | 3     | Slightly true for me    |
| 1     | 4     | Slightly false for me   |
| 1     | 5     | Mostly false for me     |
| 3     | 6     | Completely false for me |
| 3995  | 9     | not asked               |

=====  
Name: q6\_11  
Description: Whether the statement is True -- Other people always seem to get the breaks

| Count | Code  | Label                   |
|-------|-------|-------------------------|
| ----- | ----- | -----                   |
| 0     | 1     | Completely true for me  |
| 0     | 2     | Mostly true for me      |
| 3     | 3     | Slightly true for me    |
| 2     | 4     | Slightly false for me   |
| 0     | 5     | Mostly false for me     |
| 0     | 6     | Completely false for me |
| 3995  | 9     | not asked               |

=====  
Name: q6\_12  
Description: Whether the statement is True -- I wonder why sometimes I feel so bitter about things

| Count | Code  | Label                  |
|-------|-------|------------------------|
| ----- | ----- | -----                  |
| 1     | 1     | Completely true for me |
| 1     | 2     | Mostly true for me     |
| 0     | 3     | Slightly true for me   |
| 0     | 4     | Slightly false for me  |

2 5 Mostly false for me  
1 6 Completely false for me  
3995 9 not asked

=====  
Name: q7\_1  
Description: Whether agree with the statement (conspiracy predispositions) --  
Much of our lives are being controlled by plots hatched in  
secret places.

| Count | Code | Label                      |
|-------|------|----------------------------|
| 384   | 1    | Strongly agree             |
| 729   | 2    | Somewhat agree             |
| 873   | 3    | Neither agree nor disagree |
| 610   | 4    | Somewhat disagree          |
| 1404  | 5    | Strongly disagree          |

=====  
Name: q7\_2  
Description: Whether agree with the statement (conspiracy predispositions) --  
Even though we live in a democracy, a few people will always run  
things anyway.

| Count | Code | Label                      |
|-------|------|----------------------------|
| 869   | 1    | Strongly agree             |
| 1753  | 2    | Somewhat agree             |
| 714   | 3    | Neither agree nor disagree |
| 417   | 4    | Somewhat disagree          |
| 247   | 5    | Strongly disagree          |

=====  
Name: q7\_3  
Description: Whether agree with the statement (conspiracy predispositions) --  
The people who really "run" the country are not known to the  
voter.

| Count | Code | Label                      |
|-------|------|----------------------------|
| 832   | 1    | Strongly agree             |
| 1257  | 2    | Somewhat agree             |
| 867   | 3    | Neither agree nor disagree |
| 582   | 4    | Somewhat disagree          |
| 462   | 5    | Strongly disagree          |

=====  
Name: q7\_4  
Description: Whether agree with the statement (conspiracy predispositions) --  
Big events like wars, recessions, and the outcomes of elections  
are controlled by small groups of people who are working in

secret against the rest of us.

| Count | Code | Label                      |
|-------|------|----------------------------|
| 516   | 1    | Strongly agree             |
| 881   | 2    | Somewhat agree             |
| 1004  | 3    | Neither agree nor disagree |
| 653   | 4    | Somewhat disagree          |
| 945   | 5    | Strongly disagree          |
| 1     | 8    | skipped                    |

=====  
Name: q8  
Description: How much trust you have in the mass media

| Count | Code | Label         |
|-------|------|---------------|
| 352   | 1    | A great deal  |
| 1253  | 2    | A fair amount |
| 1054  | 3    | Not very much |
| 1340  | 4    | None at all   |
| 1     | 8    | skipped       |

=====  
Name: q9  
Description: How accurate is the news posted online

| Count | Code | Label               |
|-------|------|---------------------|
| 396   | 1    | Very accurate       |
| 1544  | 2    | Somewhat accurate   |
| 1165  | 3    | Not too accurate    |
| 895   | 4    | Not at all accurate |

=====  
Name: q10a\_1  
Description: Fox News

| Count | Code | Label        |
|-------|------|--------------|
| 5     | 1    | selected     |
| 0     | 2    | not selected |
| 3995  | 9    | not asked    |

=====  
Name: q10a\_2  
Description: The New York Times

| Count | Code | Label    |
|-------|------|----------|
| 5     | 1    | selected |

|      |   |              |
|------|---|--------------|
| 0    | 2 | not selected |
| 3995 | 9 | not asked    |

=====  
Name: q10a\_3  
Description: CNN

| Count | Code | Label        |
|-------|------|--------------|
| ----- | ---- | -----        |
| 5     | 1    | selected     |
| 0     | 2    | not selected |
| 3995  | 9    | not asked    |

=====  
Name: q10a\_4  
Description: The Washington Post

| Count | Code | Label        |
|-------|------|--------------|
| ----- | ---- | -----        |
| 5     | 1    | selected     |
| 0     | 2    | not selected |
| 3995  | 9    | not asked    |

=====  
Name: q10a\_5  
Description: MSNBC

| Count | Code | Label        |
|-------|------|--------------|
| ----- | ---- | -----        |
| 5     | 1    | selected     |
| 0     | 2    | not selected |
| 3995  | 9    | not asked    |

=====  
Name: q10a\_6  
Description: Breitbart

| Count | Code | Label        |
|-------|------|--------------|
| ----- | ---- | -----        |
| 3     | 1    | selected     |
| 2     | 2    | not selected |
| 3995  | 9    | not asked    |

=====  
Name: q10a\_7  
Description: InfoWars

| Count | Code | Label        |
|-------|------|--------------|
| ----- | ---- | -----        |
| 2     | 1    | selected     |
| 3     | 2    | not selected |

```
=====
Name:      q11_1
Description: How much you trust you have in this news source -- Fox News
```

| Count | Code  | Label         |
|-------|-------|---------------|
| ----- | ----- | -----         |
| 0     | 1     | A great deal  |
| 1     | 2     | A fair amount |
| 3     | 3     | Not very much |
| 1     | 4     | None at all   |
| 3995  | 9     | not asked     |

```
=====
Name:      q11_2
Description: How much you trust you have in this news source -- The New York Times
```

| Count | Code  | Label         |
|-------|-------|---------------|
| ----- | ----- | -----         |
| 2     | 1     | A great deal  |
| 3     | 2     | A fair amount |
| 0     | 3     | Not very much |
| 0     | 4     | None at all   |
| 3995  | 9     | not asked     |

```
=====
Name:      q11_3
Description: How much you trust you have in this news source -- CNN
```

| Count | Code  | Label         |
|-------|-------|---------------|
| ----- | ----- | -----         |
| 1     | 1     | A great deal  |
| 3     | 2     | A fair amount |
| 1     | 3     | Not very much |
| 0     | 4     | None at all   |
| 3995  | 9     | not asked     |

```
=====
Name:      q11_4
Description: How much you trust you have in this news source -- The Washington Post
```

| Count | Code  | Label         |
|-------|-------|---------------|
| ----- | ----- | -----         |
| 1     | 1     | A great deal  |
| 4     | 2     | A fair amount |
| 0     | 3     | Not very much |
| 0     | 4     | None at all   |
| 3995  | 9     | not asked     |

=====  
Name: q11\_5  
Description: How much you trust you have in this news source -- MSNBC

| Count | Code  | Label         |
|-------|-------|---------------|
| ----- | ----- | -----         |
| 1     | 1     | A great deal  |
| 3     | 2     | A fair amount |
| 1     | 3     | Not very much |
| 0     | 4     | None at all   |
| 3995  | 9     | not asked     |

=====  
Name: q11\_6  
Description: How much you trust you have in this news source -- Breitbart

| Count | Code  | Label         |
|-------|-------|---------------|
| ----- | ----- | -----         |
| 0     | 1     | A great deal  |
| 0     | 2     | A fair amount |
| 0     | 3     | Not very much |
| 3     | 4     | None at all   |
| 3997  | 9     | not asked     |

=====  
Name: q11\_7  
Description: How much you trust you have in this news source -- InfoWars

| Count | Code  | Label         |
|-------|-------|---------------|
| ----- | ----- | -----         |
| 0     | 1     | A great deal  |
| 0     | 2     | A fair amount |
| 1     | 3     | Not very much |
| 1     | 4     | None at all   |
| 3998  | 9     | not asked     |

=====  
Name: q12\_1  
Description: How much trust you have in information from the following source  
-- Organizations you follow on YouTube or social media platforms  
(Twitter, Facebook, Instagram, Snapchat, etc.)

| Count | Code  | Label         |
|-------|-------|---------------|
| ----- | ----- | -----         |
| 210   | 1     | A great deal  |
| 1461  | 2     | A fair amount |
| 1367  | 3     | Not very much |
| 955   | 4     | None at all   |
| 7     | 8     | skipped       |

=====  
Name: q12\_2  
Description: How much trust you have in information from the following source  
-- Celebrities you follow on YouTube or social media platforms  
(Twitter, Facebook, Instagram, Snapchat, etc.)

| Count | Code  | Label         |
|-------|-------|---------------|
| ----- | ----- | -----         |
| 107   | 1     | A great deal  |
| 541   | 2     | A fair amount |
| 1325  | 3     | Not very much |
| 2023  | 4     | None at all   |
| 4     | 8     | skipped       |

=====  
Name: q12\_3  
Description: How much trust you have in information from the following source  
-- People you follow but do not personally know on YouTube or  
social media platforms (Twitter, Facebook, Instagram, Snapchat,  
etc.)

| Count | Code  | Label         |
|-------|-------|---------------|
| ----- | ----- | -----         |
| 167   | 1     | A great deal  |
| 1071  | 2     | A fair amount |
| 1634  | 3     | Not very much |
| 1123  | 4     | None at all   |
| 5     | 8     | skipped       |

=====  
Name: q12\_4  
Description: How much trust you have in information from the following source  
-- People you follow and personally know on YouTube or social  
media platforms (Twitter, Facebook, Instagram, Snapchat, etc.)

| Count | Code  | Label         |
|-------|-------|---------------|
| ----- | ----- | -----         |
| 301   | 1     | A great deal  |
| 1638  | 2     | A fair amount |
| 1265  | 3     | Not very much |
| 792   | 4     | None at all   |
| 4     | 8     | skipped       |

=====  
Name: q12\_5  
Description: How much trust you have in information from the following source  
-- People you personally know and talk to offline

| Count | Code  | Label        |
|-------|-------|--------------|
| ----- | ----- | -----        |
| 753   | 1     | A great deal |



|      |   |               |
|------|---|---------------|
| 2352 | 2 | A fair amount |
| 718  | 3 | Not very much |
| 173  | 4 | None at all   |
| 4    | 8 | skipped       |

=====  
Name: q12\_6  
Description: How much trust you have in information from the following source  
-- The mass media (such as newspapers, TV and radio)

| Count | Code  | Label         |
|-------|-------|---------------|
| ----- | ----- | -----         |
| 401   | 1     | A great deal  |
| 1284  | 2     | A fair amount |
| 1020  | 3     | Not very much |
| 1291  | 4     | None at all   |
| 4     | 8     | skipped       |

=====  
Name: q13  
Description: How frequently you use Google

| Count | Code  | Label                        |
|-------|-------|------------------------------|
| ----- | ----- | -----                        |
| 819   | 1     | Almost constantly            |
| 1561  | 2     | Several times a day          |
| 401   | 3     | About once a day             |
| 482   | 4     | A few times a week           |
| 82    | 5     | About once a week            |
| 175   | 6     | A few times a month          |
| 41    | 7     | Once a month                 |
| 214   | 8     | Less often than once a month |
| 225   | 9     | Never                        |

=====  
Name: q14  
Description: How much of the information you find using google is accurate

| Count | Code  | Label             |
|-------|-------|-------------------|
| ----- | ----- | -----             |
| 165   | 1     | All or almost all |
| 874   | 2     | Most              |
| 1415  | 3     | Some              |
| 839   | 4     | Very little       |
| 401   | 5     | None at all       |
| 306   | 6     | Don't know        |

=====  
Name: q15  
Description: Google personalizes the search results

| Count | Code  | Label               |
|-------|-------|---------------------|
| ----- | ----- | -----               |
| 1386  | 1     | Very accurate       |
| 1815  | 2     | Somewhat accurate   |
| 515   | 3     | Not very accurate   |
| 282   | 4     | Not at all accurate |
| 2     | 8     | skipped             |

=====  
Name: q17  
Description: How much of the information you find using YouTube is accurate

| Count | Code  | Label             |
|-------|-------|-------------------|
| ----- | ----- | -----             |
| 82    | 1     | All or almost all |
| 399   | 2     | Most              |
| 1556  | 3     | Some              |
| 994   | 4     | Very little       |
| 416   | 5     | None at all       |
| 552   | 6     | Don't know        |
| 1     | 8     | skipped           |

=====  
Name: q18  
Description: YouTube personalizes the videos

| Count | Code  | Label               |
|-------|-------|---------------------|
| ----- | ----- | -----               |
| 1279  | 1     | Very accurate       |
| 1791  | 2     | Somewhat accurate   |
| 583   | 3     | Not very accurate   |
| 344   | 4     | Not at all accurate |
| 3     | 8     | skipped             |

=====  
Name: q28  
Description: How satisfied you are with the search result quality on Google

| Count | Code  | Label                |
|-------|-------|----------------------|
| ----- | ----- | -----                |
| 854   | 1     | Very satisfied       |
| 2056  | 2     | Somewhat satisfied   |
| 492   | 3     | Not very satisfied   |
| 159   | 4     | Not at all satisfied |
| 439   | 9     | not asked            |

=====  
Name: q29  
Description: How much trust you have in information on Google

| Count | Code | Label |
|-------|------|-------|
|-------|------|-------|

| Count | Code | Label             |
|-------|------|-------------------|
| 551   | 1    | A great deal      |
| 2184  | 2    | A moderate amount |
| 708   | 3    | Not much          |
| 117   | 4    | Not at all        |
| 1     | 8    | skipped           |
| 439   | 9    | not asked         |

=====  
Name: q30  
Description: What Google search results favor – Liberals or conservatives

| Count | Code | Label               |
|-------|------|---------------------|
| 1418  | 1    | Favor liberals      |
| 201   | 2    | Favor conservatives |
| 1798  | 3    | Neither             |
| 143   | 4    | Other               |
| 1     | 8    | skipped             |
| 439   | 9    | not asked           |

=====  
Name: q31  
Description: How satisfied you are with the video quality on YouTube

| Count | Code | Label                |
|-------|------|----------------------|
| 611   | 1    | Very satisfied       |
| 2119  | 2    | Somewhat satisfied   |
| 578   | 3    | Not very satisfied   |
| 153   | 4    | Not at all satisfied |
| 2     | 8    | skipped              |
| 537   | 9    | not asked            |

=====  
Name: q32  
Description: How much trust you have in YouTube videos

| Count | Code | Label             |
|-------|------|-------------------|
| 333   | 1    | A great deal      |
| 2120  | 2    | A moderate amount |
| 898   | 3    | Not much          |
| 111   | 4    | Not at all        |
| 1     | 8    | skipped           |
| 537   | 9    | not asked         |

=====  
Name: q33  
Description: What YouTube videos favor – Liberals or conservatives

| Count | Code | Label               |
|-------|------|---------------------|
| 1163  | 1    | Favor liberals      |
| 279   | 2    | Favor conservatives |
| 1846  | 3    | Neither             |
| 172   | 4    | Other               |
| 3     | 8    | skipped             |
| 537   | 9    | not asked           |

=====  
Name: q34\_1  
Description: How concerned you feel about the following -- Getting coronavirus yourself

| Count | Code | Label                          |
|-------|------|--------------------------------|
| 725   | 1    | Not at all concerned           |
| 901   | 2    | Not very concerned             |
| 1283  | 3    | Somewhat concerned             |
| 1015  | 4    | Very concerned                 |
| 13    | 5    | Not applicable to me           |
| 63    | 6    | Already contracted coronavirus |

=====  
Name: q34\_2  
Description: How concerned you feel about the following -- Family members getting coronavirus

| Count | Code | Label                          |
|-------|------|--------------------------------|
| 0     | 1    | Not at all concerned           |
| 0     | 2    | Not very concerned             |
| 1     | 3    | Somewhat concerned             |
| 4     | 4    | Very concerned                 |
| 0     | 5    | Not applicable to me           |
| 0     | 6    | Already contracted coronavirus |
| 3995  | 9    | not asked                      |

=====  
Name: q35  
Description: How much of a threat is the coronavirus for US people

| Count | Code | Label          |
|-------|------|----------------|
| 2208  | 1    | A major threat |
| 1294  | 2    | A minor threat |
| 497   | 3    | Not a threat   |
| 1     | 8    | skipped        |

=====  
Name: q36\_2

Description: Believe the following or not -- Avoiding larger gatherings of people can help prevent the spread of the coronavirus

| Count | Code | Label               |
|-------|------|---------------------|
| 250   | 1    | Not at all accurate |
| 335   | 2    | Not very accurate   |
| 1008  | 3    | Somewhat accurate   |
| 2407  | 4    | Very accurate       |

=====  
Name: q36\_3

Description: Believe the following or not -- Masks are an effective way to prevent the spread of the coronavirus

| Count | Code | Label               |
|-------|------|---------------------|
| 600   | 1    | Not at all accurate |
| 559   | 2    | Not very accurate   |
| 1068  | 3    | Somewhat accurate   |
| 1773  | 4    | Very accurate       |

=====  
Name: q36\_4

Description: Believe the following or not -- Coronavirus can be spread by people who do not show symptoms

| Count | Code | Label               |
|-------|------|---------------------|
| 168   | 1    | Not at all accurate |
| 303   | 2    | Not very accurate   |
| 938   | 3    | Somewhat accurate   |
| 2590  | 4    | Very accurate       |
| 1     | 8    | skipped             |

=====  
Name: q36\_6

Description: Believe the following or not -- The medication hydroxychloroquine is proven to cure or prevent COVID-19, the illness caused by the novel coronavirus

| Count | Code | Label               |
|-------|------|---------------------|
| 1697  | 1    | Not at all accurate |
| 675   | 2    | Not very accurate   |
| 923   | 3    | Somewhat accurate   |
| 704   | 4    | Very accurate       |
| 1     | 8    | skipped             |

=====  
Name: q36\_8

Description: Believe the following or not -- The Chinese government created the coronavirus that causes COVID-19 as a bioweapon

| Count | Code | Label               |
|-------|------|---------------------|
| 1462  | 1    | Not at all accurate |
| 760   | 2    | Not very accurate   |
| 826   | 3    | Somewhat accurate   |
| 949   | 4    | Very accurate       |
| 3     | 8    | skipped             |

=====  
Name: q36\_10  
Description: Believe the following or not -- A group funded by Bill Gates patented the coronavirus that causes COVID-19

| Count | Code | Label               |
|-------|------|---------------------|
| 2372  | 1    | Not at all accurate |
| 745   | 2    | Not very accurate   |
| 543   | 3    | Somewhat accurate   |
| 339   | 4    | Very accurate       |
| 1     | 8    | skipped             |

=====  
Name: q36\_1  
Description: Believe the following or not -- Frequent handwashing is a way to protect against the coronavirus

| Count | Code | Label               |
|-------|------|---------------------|
| 0     | 1    | Not at all accurate |
| 0     | 2    | Not very accurate   |
| 1     | 3    | Somewhat accurate   |
| 4     | 4    | Very accurate       |
| 3995  | 9    | not asked           |

=====  
Name: q36\_5  
Description: Believe the following or not -- A new loss of taste or smell is a symptom of the coronavirus

| Count | Code | Label               |
|-------|------|---------------------|
| 0     | 1    | Not at all accurate |
| 0     | 2    | Not very accurate   |
| 2     | 3    | Somewhat accurate   |
| 3     | 4    | Very accurate       |
| 3995  | 9    | not asked           |

=====

Name: q36\_7  
Description: Believe the following or not -- The coronavirus is being spread by 5G cell phone technology

| Count | Code | Label               |
|-------|------|---------------------|
| 5     | 1    | Not at all accurate |
| 0     | 2    | Not very accurate   |
| 0     | 3    | Somewhat accurate   |
| 0     | 4    | Very accurate       |
| 3995  | 9    | not asked           |

Name: q36\_9  
Description: Believe the following or not -- The media is exaggerating the threat from the coronavirus to damage President Trump

| Count | Code | Label               |
|-------|------|---------------------|
| 4     | 1    | Not at all accurate |
| 1     | 2    | Not very accurate   |
| 0     | 3    | Somewhat accurate   |
| 0     | 4    | Very accurate       |
| 3995  | 9    | not asked           |

Name: q37\_1  
Description: Agree with the following or not -- Getting vaccines is a good way to protect children from disease

| Count | Code | Label                      |
|-------|------|----------------------------|
| 2431  | 1    | Strongly agree             |
| 782   | 2    | Somewhat agree             |
| 404   | 3    | Neither agree nor disagree |
| 142   | 4    | Somewhat disagree          |
| 241   | 5    | Strongly disagree          |

Name: q37\_2  
Description: Agree with the following or not -- Generally I do what my doctor recommends about vaccines

| Count | Code | Label                      |
|-------|------|----------------------------|
| 1978  | 1    | Strongly agree             |
| 967   | 2    | Somewhat agree             |
| 537   | 3    | Neither agree nor disagree |
| 255   | 4    | Somewhat disagree          |
| 263   | 5    | Strongly disagree          |

=====  
Name: q37\_3  
Description: Agree with the following or not -- New vaccines are recommended only if they are safe

| Count | Code | Label                      |
|-------|------|----------------------------|
| ----- | ---- | -----                      |
| 1305  | 1    | Strongly agree             |
| 1205  | 2    | Somewhat agree             |
| 755   | 3    | Neither agree nor disagree |
| 401   | 4    | Somewhat disagree          |
| 333   | 5    | Strongly disagree          |
| 1     | 8    | skipped                    |

=====  
Name: q37\_4  
Description: Agree with the following or not -- Children do not need vaccines for diseases that are not common anymore

| Count | Code | Label                      |
|-------|------|----------------------------|
| ----- | ---- | -----                      |
| 201   | 1    | Strongly agree             |
| 245   | 2    | Somewhat agree             |
| 567   | 3    | Neither agree nor disagree |
| 824   | 4    | Somewhat disagree          |
| 2163  | 5    | Strongly disagree          |

=====  
Name: q37\_5  
Description: Agree with the following or not -- I am concerned about serious side effects of vaccines

| Count | Code | Label                      |
|-------|------|----------------------------|
| ----- | ---- | -----                      |
| 842   | 1    | Strongly agree             |
| 978   | 2    | Somewhat agree             |
| 764   | 3    | Neither agree nor disagree |
| 696   | 4    | Somewhat disagree          |
| 720   | 5    | Strongly disagree          |

=====  
Name: q37\_6  
Description: Agree with the following or not -- Some vaccines cause autism in healthy children

| Count | Code | Label                      |
|-------|------|----------------------------|
| ----- | ---- | -----                      |
| 412   | 1    | Strongly agree             |
| 409   | 2    | Somewhat agree             |
| 977   | 3    | Neither agree nor disagree |
| 461   | 4    | Somewhat disagree          |



1740 5 Strongly disagree  
1 8 skipped

=====  
Name: q37\_7  
Description: Agree with the following or not -- Vaccinations are one of the most significant achievements in improving public health

| Count | Code  | Label                      |
|-------|-------|----------------------------|
| ----- | ----- | -----                      |
| 2252  | 1     | Strongly agree             |
| 897   | 2     | Somewhat agree             |
| 527   | 3     | Neither agree nor disagree |
| 141   | 4     | Somewhat disagree          |
| 183   | 5     | Strongly disagree          |

=====  
Name: q38  
Description: How often you don't take surveys seriously

| Count | Code  | Label            |
|-------|-------|------------------|
| ----- | ----- | -----            |
| 3300  | 1     | Never            |
| 457   | 2     | Rarely           |
| 163   | 3     | Some of the time |
| 42    | 4     | Most of the time |
| 38    | 5     | Always           |

=====  
Name: q39  
Description: Did you make an effort to look up information

| Count | Code  | Label                             |
|-------|-------|-----------------------------------|
| ----- | ----- | -----                             |
| 193   | 1     | Yes, I looked up information      |
| 3807  | 2     | No, I did not look up information |

=====  
Name: platform\_1  
Description: Desktop or laptop computer

| Count | Code  | Label        |
|-------|-------|--------------|
| ----- | ----- | -----        |
| 3850  | 1     | selected     |
| 150   | 2     | not selected |

=====  
Name: platform\_2  
Description: Tablet

| Count | Code | Label |
|-------|------|-------|
|-------|------|-------|

| ----- | ----- | -----        |
|-------|-------|--------------|
| 1344  | 1     | selected     |
| 2656  | 2     | not selected |

=====  
Name: platform\_3  
Description: Smartphone

| ----- | ----- | -----        |
|-------|-------|--------------|
| Count | Code  | Label        |
| ----- | ----- | -----        |
| 2372  | 1     | selected     |
| 1628  | 2     | not selected |

=====  
Name: browsers\_1  
Description: Chrome

| ----- | ----- | -----        |
|-------|-------|--------------|
| Count | Code  | Label        |
| ----- | ----- | -----        |
| 2626  | 1     | selected     |
| 1225  | 2     | not selected |
| 149   | 9     | not asked    |

=====  
Name: browsers\_2  
Description: Firefox

| ----- | ----- | -----        |
|-------|-------|--------------|
| Count | Code  | Label        |
| ----- | ----- | -----        |
| 1092  | 1     | selected     |
| 2759  | 2     | not selected |
| 149   | 9     | not asked    |

=====  
Name: browsers\_3  
Description: Safari

| ----- | ----- | -----        |
|-------|-------|--------------|
| Count | Code  | Label        |
| ----- | ----- | -----        |
| 524   | 1     | selected     |
| 3327  | 2     | not selected |
| 149   | 9     | not asked    |

=====  
Name: browsers\_4  
Description: Microsoft Edge

| ----- | ----- | -----        |
|-------|-------|--------------|
| Count | Code  | Label        |
| ----- | ----- | -----        |
| 903   | 1     | selected     |
| 2948  | 2     | not selected |

149 9 not asked

=====  
Name: browsers\_5  
Description: Internet Explorer

| Count | Code  | Label        |
|-------|-------|--------------|
| ----- | ----- | -----        |
| 595   | 1     | selected     |
| 3256  | 2     | not selected |
| 149   | 9     | not asked    |

=====  
Name: browsers\_6  
Description: None of the above

| Count | Code  | Label        |
|-------|-------|--------------|
| ----- | ----- | -----        |
| 82    | 1     | selected     |
| 3769  | 2     | not selected |
| 149   | 9     | not asked    |

=====  
Name: browser\_top  
Description: browser\_top

| Count | Code  | Label             |
|-------|-------|-------------------|
| ----- | ----- | -----             |
| 733   | 1     | Chrome            |
| 280   | 2     | Firefox           |
| 79    | 3     | Safari            |
| 208   | 4     | Microsoft Edge    |
| 79    | 5     | Internet Explorer |
| 2621  | 9     | not asked         |

=====  
Name: elig\_extension  
Description: elig\_extension

| Count | Code  | Label |
|-------|-------|-------|
| ----- | ----- | ----- |
| 2887  | 1     | Yes   |
| 1113  | 2     | No    |

=====  
Name: extension\_install  
Description: Agree to install extension

| Count | Code  | Label |
|-------|-------|-------|
| ----- | ----- | ----- |
| 1473  | 1     | Yes   |

1415 2 No  
1112 9 not asked

=====  
Name: birthyr  
Description: Birth Year

Numeric Variable - no categories

answered : 4000  
=====

=====  
Name: gender  
Description: Gender

| Count | Code  | Label  |
|-------|-------|--------|
| ----- | ----- | -----  |
| 2175  | 1     | Male   |
| 1825  | 2     | Female |

=====  
Name: race  
Description: Race

| Count | Code  | Label             |
|-------|-------|-------------------|
| ----- | ----- | -----             |
| 3035  | 1     | White             |
| 321   | 2     | Black             |
| 278   | 3     | Hispanic          |
| 144   | 4     | Asian             |
| 38    | 5     | Native American   |
| 67    | 6     | Two or more races |
| 113   | 7     | Other             |
| 4     | 8     | Middle Eastern    |

=====  
Name: educ  
Description: Education

| Count | Code  | Label                |
|-------|-------|----------------------|
| ----- | ----- | -----                |
| 57    | 1     | No HS                |
| 762   | 2     | High school graduate |
| 963   | 3     | Some college         |
| 477   | 4     | 2-year               |
| 1023  | 5     | 4-year               |
| 718   | 6     | Post-grad            |

=====  
Name: marstat  
Description: Marital Status

| Count | Code  | Label                        |
|-------|-------|------------------------------|
| ----- | ----- | -----                        |
| 2106  | 1     | Married                      |
| 51    | 2     | Separated                    |
| 467   | 3     | Divorced                     |
| 190   | 4     | Widowed                      |
| 1021  | 5     | Never married                |
| 165   | 6     | Domestic / civil partnership |

=====  
Name: employ  
Description: Employment Status

| Count | Code  | Label                |
|-------|-------|----------------------|
| ----- | ----- | -----                |
| 1563  | 1     | Full-time            |
| 388   | 2     | Part-time            |
| 120   | 3     | Temporarily laid off |
| 261   | 4     | Unemployed           |
| 958   | 5     | Retired              |
| 293   | 6     | Permanently disabled |
| 192   | 7     | Homemaker            |
| 145   | 8     | Student              |
| 80    | 9     | Other                |

=====  
Name: faminc\_new  
Description: Family income

| Count | Code  | Label                 |
|-------|-------|-----------------------|
| ----- | ----- | -----                 |
| 163   | 1     | Less than \$10,000    |
| 256   | 2     | \$10,000 - \$19,999   |
| 332   | 3     | \$20,000 - \$29,999   |
| 389   | 4     | \$30,000 - \$39,999   |
| 296   | 5     | \$40,000 - \$49,999   |
| 311   | 6     | \$50,000 - \$59,999   |
| 286   | 7     | \$60,000 - \$69,999   |
| 311   | 8     | \$70,000 - \$79,999   |
| 389   | 9     | \$80,000 - \$99,999   |
| 255   | 10    | \$100,000 - \$119,999 |
| 265   | 11    | \$120,000 - \$149,999 |
| 188   | 12    | \$150,000 - \$199,999 |
| 65    | 13    | \$200,000 - \$249,999 |
| 49    | 14    | \$250,000 - \$349,999 |
| 17    | 15    | \$350,000 - \$499,999 |
| 17    | 16    | \$500,000 or more     |
| 411   | 97    | Prefer not to say     |

=====  
Name: presvote16post

Description: 2016 President Vote Post Election

| Count | Code | Label                      |
|-------|------|----------------------------|
| 1234  | 1    | Hillary Clinton            |
| 1614  | 2    | Donald Trump               |
| 114   | 3    | Gary Johnson               |
| 66    | 4    | Jill Stein                 |
| 20    | 5    | Evan McMullin              |
| 84    | 6    | Other                      |
| 868   | 7    | Did not vote for President |

=====  
Name: inputstate  
Description: State of Residence

| Count | Code | Label                |
|-------|------|----------------------|
| 71    | 1    | Alabama              |
| 10    | 2    | Alaska               |
| 86    | 4    | Arizona              |
| 39    | 5    | Arkansas             |
| 342   | 6    | California           |
| 59    | 8    | Colorado             |
| 36    | 9    | Connecticut          |
| 11    | 10   | Delaware             |
| 15    | 11   | District of Columbia |
| 314   | 12   | Florida              |
| 129   | 13   | Georgia              |
| 9     | 15   | Hawaii               |
| 29    | 16   | Idaho                |
| 155   | 17   | Illinois             |
| 76    | 18   | Indiana              |
| 40    | 19   | Iowa                 |
| 30    | 20   | Kansas               |
| 86    | 21   | Kentucky             |
| 43    | 22   | Louisiana            |
| 25    | 23   | Maine                |
| 51    | 24   | Maryland             |
| 82    | 25   | Massachusetts        |
| 117   | 26   | Michigan             |
| 68    | 27   | Minnesota            |
| 24    | 28   | Mississippi          |
| 92    | 29   | Missouri             |
| 17    | 30   | Montana              |
| 23    | 31   | Nebraska             |
| 49    | 32   | Nevada               |
| 21    | 33   | New Hampshire        |
| 118   | 34   | New Jersey           |
| 27    | 35   | New Mexico           |
| 269   | 36   | New York             |

|     |    |                                |
|-----|----|--------------------------------|
| 126 | 37 | North Carolina                 |
| 6   | 38 | North Dakota                   |
| 152 | 39 | Ohio                           |
| 30  | 40 | Oklahoma                       |
| 76  | 41 | Oregon                         |
| 216 | 42 | Pennsylvania                   |
| 12  | 44 | Rhode Island                   |
| 47  | 45 | South Carolina                 |
| 17  | 46 | South Dakota                   |
| 77  | 47 | Tennessee                      |
| 304 | 48 | Texas                          |
| 37  | 49 | Utah                           |
| 10  | 50 | Vermont                        |
| 113 | 51 | Virginia                       |
| 99  | 53 | Washington                     |
| 29  | 54 | West Virginia                  |
| 75  | 55 | Wisconsin                      |
| 11  | 56 | Wyoming                        |
| 0   | 60 | American Samoa                 |
| 0   | 64 | Federated States of Micronesia |
| 0   | 66 | Guam                           |
| 0   | 68 | Marshall Islands               |
| 0   | 69 | Northern Mariana Islands       |
| 0   | 70 | Palau                          |
| 0   | 72 | Puerto Rico                    |
| 0   | 74 | U.S. Minor Outlying Islands    |
| 0   | 78 | Virgin Islands                 |
| 0   | 81 | Alberta                        |
| 0   | 82 | British Columbia               |
| 0   | 83 | Manitoba                       |
| 0   | 84 | New Brunswick                  |
| 0   | 85 | Newfoundland                   |
| 0   | 86 | Northwest Territories          |
| 0   | 87 | Nova Scotia                    |
| 0   | 88 | Nunavut                        |
| 0   | 89 | Ontario                        |
| 0   | 90 | Prince Edward Island           |
| 0   | 91 | Quebec                         |
| 0   | 92 | Saskatchewan                   |
| 0   | 93 | Yukon Territory                |
| 0   | 99 | Not in the U.S. or Canada      |

=====  
Name: votereg  
Description: Voter Registration Status

| Count | Code  | Label      |
|-------|-------|------------|
| ----- | ----- | -----      |
| 3796  | 1     | Yes        |
| 165   | 2     | No         |
| 39    | 3     | Don't know |

=====  
Name:            ideo5  
Description:     Ideology (1)

| Count | Code | Label             |
|-------|------|-------------------|
| ----- | ---- | -----             |
| 582   | 1    | Very liberal      |
| 625   | 2    | Liberal           |
| 1049  | 3    | Moderate          |
| 772   | 4    | Conservative      |
| 844   | 5    | Very conservative |
| 128   | 6    | Not sure          |

=====  
Name:            newsint  
Description:     Political Interest

| Count | Code | Label             |
|-------|------|-------------------|
| ----- | ---- | -----             |
| 2640  | 1    | Most of the time  |
| 864   | 2    | Some of the time  |
| 277   | 3    | Only now and then |
| 160   | 4    | Hardly at all     |
| 59    | 7    | Don't know        |

=====  
Name:            religpew  
Description:     Religion

| Count | Code | Label                     |
|-------|------|---------------------------|
| ----- | ---- | -----                     |
| 1353  | 1    | Protestant                |
| 729   | 2    | Roman Catholic            |
| 57    | 3    | Mormon                    |
| 36    | 4    | Eastern or Greek Orthodox |
| 100   | 5    | Jewish                    |
| 24    | 6    | Muslim                    |
| 31    | 7    | Buddhist                  |
| 20    | 8    | Hindu                     |
| 357   | 9    | Atheist                   |
| 303   | 10   | Agnostic                  |
| 722   | 11   | Nothing in particular     |
| 268   | 12   | Something else            |

=====  
Name:            pew\_churatd  
Description:     Church attendance (Pew version)

| Count | Code | Label |
|-------|------|-------|
| ----- | ---- | ----- |



|      |   |                       |
|------|---|-----------------------|
| 321  | 1 | More than once a week |
| 698  | 2 | Once a week           |
| 267  | 3 | Once or twice a month |
| 431  | 4 | A few times a year    |
| 846  | 5 | Seldom                |
| 1378 | 6 | Never                 |
| 59   | 7 | Don't know            |

```
=====
Name:      pew_bornagain
Description: Born Again (Pew version)
```

| Count | Code | Label |
|-------|------|-------|
| ----- | ---- | ----- |
| 1124  | 1    | Yes   |
| 2876  | 2    | No    |

```
=====
Name:      pew_religimp
Description: Importance of religion (Pew version)
```

| Count | Code | Label                |
|-------|------|----------------------|
| ----- | ---- | -----                |
| 1565  | 1    | Very important       |
| 816   | 2    | Somewhat important   |
| 556   | 3    | Not too important    |
| 1063  | 4    | Not at all important |

```
=====
Name:      pew_prayer
Description: Frequency of Prayer (Pew version)
```

| Count | Code | Label               |
|-------|------|---------------------|
| ----- | ---- | -----               |
| 1157  | 1    | Several times a day |
| 522   | 2    | Once a day          |
| 438   | 3    | A few times a week  |
| 97    | 4    | Once a week         |
| 220   | 5    | A few times a month |
| 506   | 6    | Seldom              |
| 948   | 7    | Never               |
| 112   | 8    | Don't know          |

Date format variables

```
=====
Name:      starttime
Description: Questionnaire Start Time
            DateTime variable - no categories
```

```
=====
Name:      endtime
```

Description: Questionnaire End Time  
DateTime variable - no categories
